# Supplementary material for: Synergy of anodic oxidation and cathodic reduction leads to electrochemical deoxygenative C2 arylation of quinoline N-oxides
Source: Royal Society of Chemistry journal article supplement (doi:10.1039/c9cc05841a), 2019-01-01

## Supporting Information

### **Synergy of anodic oxidation and cathodic reduction leads to electrochemical deoxygenative C2 arylation of quinoline**

#### ***N*-oxides**

Yong Yuan,<sup>†ac</sup> Minbao Jiang,<sup>†ab</sup> Tao Wang,<sup>\*ab</sup> Yunkui Xiong,<sup>ab</sup> Jun Li,<sup>ab</sup> Huijiao Guo,<sup>ab</sup> and  
Aiwen Lei<sup>\*c</sup>

<sup>a</sup> National Research Center for Carbohydrate Synthesis, Jiangxi Province's Key Laboratory of  
Chemical Biology, Jiangxi Normal University, Nanchang 330022, P. R. China. E-mail:  
wangtao@jxnu.edu.cn; aiwenlei@whu.edu.cn.

<sup>b</sup> College of Chemistry and Chemical Engineering, Jiangxi Normal University, Nanchang 330022,  
P. R. China.

<sup>c</sup> College of Chemistry and Molecular Sciences, the Institute for Advanced Studies (IAS), Wuhan  
University, Wuhan, Hubei 430072, P. R. China.

## General information

Unless otherwise noted, materials were obtained from commercial suppliers and used without further purification. The instrument for electrolysis is dual display potentiostat (DJS-292B) (made in China). The anodic electrode was graphite rod ( $\phi$  6 mm) and cathodic electrode was platinum plate (15 mm $\times$ 15 mm $\times$ 0.3 mm). Thin layer chromatography (TLC) employed glass 0.25 mm silica gel plates. Flash chromatography columns were packed with 300-400 mesh silica gel in petroleum (boiling point is between 60-90 °C). Gradient flash chromatography was conducted eluting with a continuous gradient from petroleum to the indicated solvent, and they are listed as volume/volume ratios. NMR spectra were recorded on a Bruker spectrometer at 400 MHz ( $^1\text{H}$  NMR), 100 MHz ( $^{13}\text{C}$  NMR), 376 MHz ( $^{19}\text{F}$  NMR).

## Experimental procedure

### General procedure for the preparation of quinoline-*N*-oxides<sup>1</sup>

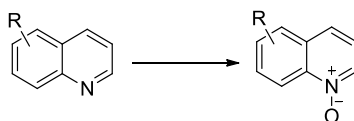

To a mixture of quinoline (10.0 mmol) in AcOH (20 mL) was added H<sub>2</sub>O<sub>2</sub> (30 wt%, 1.40 mL) at room temperature. The reaction mixture was stirred at 70 °C for 36 h, and then was cooled to room temperature. The product was extracted with DCM (3 × 10 mL), and the combined organic layers were dried over Na<sub>2</sub>SO<sub>4</sub>. The solvent was removed under reduced pressure, and the residue obtained was purified via silica gel chromatography (eluent: ethyl acetate/methanol = 8/1) to afford quinoline *N*-oxide.

### General procedure for the preparation of sulfonyl hydrazides<sup>2</sup>

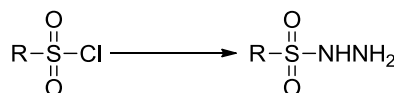

The hydrazine monohydrate (30 mmol) was added dropwise into the solution of sulfonyl chloride (10 mmol) in THF (50 mL) under nitrogen at 0 °C. Subsequently, the mixture was further stirred at 0 °C for 30 minutes. After the completion of the reaction, the solvent was removed by evaporation, and the residue was extracted with dichloromethane (3 x 20 mL), and the combined organic layer was washed with water, and brine, and dried over Na<sub>2</sub>SO<sub>4</sub>. Concentration in vacuum followed by silica gel column purification with petroleum ether/ethyl acetate eluent gave the desired product in yields range from 70-95%.

### General procedure for electrochemical deoxygenative C2 arylation:

In an oven-dried undivided three-necked bottle (25 mL) equipped with a stir bar, quinoline-*N*-oxides **1** (0.5 mmol), sulfonyl hydrazides **2** (2 equiv.), and <sup>n</sup>Bu<sub>4</sub>NBF<sub>4</sub> (0.1 mmol, 32.9 mg) were combined and added. The bottle was equipped with graphite rod (ϕ 6 mm, about 16 mm immersion depth in solution) as the anode and platinum plate (15 mm × 15 mm × 0.3 mm) as the cathode and was then charged with nitrogen. Under the protection of N<sub>2</sub>, HFIP (1.0 mL), and MeCN (9.0 mL) were injected respectively into the tubes via syringes. The reaction mixture was

stirred and electrolyzed at a constant current of 24 mA at 70 °C for 2.5 h. When the reaction was finished, the pure product was obtained by flash column chromatography on silica gel (petroleum ether/ethyl acetate = 10/1).

### **Procedure for gram scale synthesis of 3aa:**

In an oven-dried undivided three-necked bottle equipped with a stir bar, quinoline-*N*-oxide **1a** (5 mmol, 725 mg), *p*-tosylsulfonyl hydrazide **2a** (2 equiv., 1.9 g), and <sup>n</sup>Bu<sub>4</sub>NBF<sub>4</sub> (1 mmol, 329 mg) were combined and added. The bottle was equipped with graphite rod (ϕ 6 mm, about 16 mm immersion depth in solution) as the anode and platinum plate (15 mm × 15 mm × 0.3 mm) as the cathode and was then charged with nitrogen. Under the protection of N<sub>2</sub>, HFIP (10 mL), and MeCN (90 mL) were injected respectively into the tubes via syringes. The reaction mixture was stirred and electrolyzed at a constant current of 24 mA at 70 °C for 25 h. When the reaction was finished, the pure product was obtained by flash column chromatography on silica gel (petroleum ether/ethyl acetate = 10/1).

### **Procedure for cyclic voltammetry (CV):**

Cyclic voltammetry was performed in a three-electrode cell connected to a Schlenk line under nitrogen at room temperature. The working electrode was a steady glassy carbon disk electrode while the counter electrode was a platinum wire. The reference was an Ag/AgCl electrode submerged in saturated aqueous KCl solution. A mixed solvent (MeCN/HFIP = 9/1, 10 mL) containing <sup>n</sup>Bu<sub>4</sub>NBF<sub>4</sub> (0.1 mmol) was poured into the electrochemical cell in cyclic voltammetry experiments. The scan rate was 0.10 V/s, ranging from 0 V to 2.5 V.

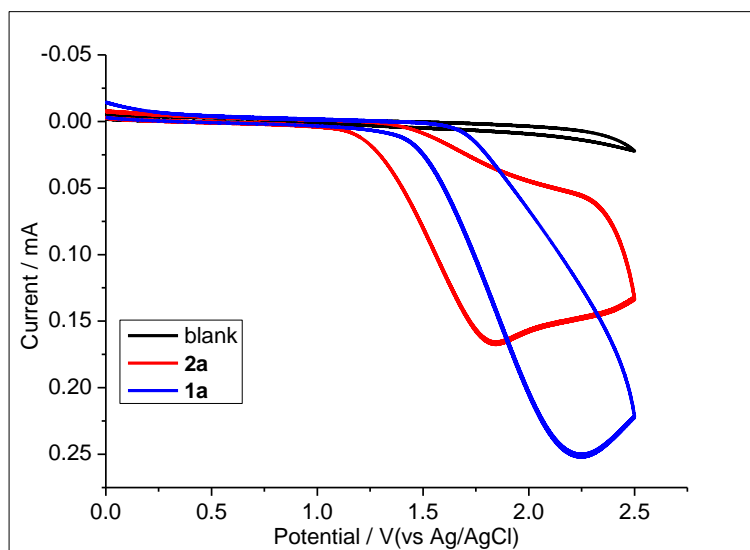

**Figure S1.** Cyclic voltammogram: **1a**, 0.1 mmol, **2a**, 0.1 mmol.

## Detailed descriptions for products

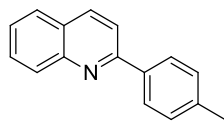

**2-(*p*-Tolyl)quinoline (3aa).**<sup>3</sup> Yellowish solid (79.2 mg, 72%). <sup>1</sup>H NMR (400 MHz, CDCl<sub>3</sub>) δ 8.36 (d, *J* = 8.5 Hz, 1H), 8.21 – 8.14 (m, 2H), 8.02 (d, *J* = 8.3 Hz, 2H), 7.86 (d, *J* = 8.2 Hz, 1H), 7.80 – 7.75 (m, 1H), 7.68 – 7.61 (m, 1H), 7.32 (d, *J* = 8.1 Hz, 2H), 2.40 (s, 3H). <sup>13</sup>C NMR (100 MHz, CDCl<sub>3</sub>) δ 158.4, 147.4, 144.7, 138.6, 136.1, 130.9, 130.4, 129.7, 129.1, 129.0, 128.8, 127.6, 117.6, 21.6.

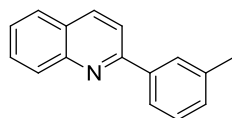

**2-(*m*-Tolyl)quinoline (3ab).**<sup>3</sup> Yellowish solid (56 mg, 52%). <sup>1</sup>H NMR (400 MHz, CDCl<sub>3</sub>) δ 8.38 (d, *J* = 8.5 Hz, 1H), 8.20 (t, *J* = 8.1 Hz, 2H), 7.97 – 7.85 (m, 3H), 7.79 (ddd, *J* = 8.4, 6.9, 1.4 Hz, 1H), 7.69 – 7.62 (m, 1H), 7.40 (t, *J* = 6.4 Hz, 2H), 2.42 (s, 3H). <sup>13</sup>C NMR (100 MHz, CDCl<sub>3</sub>) δ 158.2, 147.5, 139.3, 139.0, 138.7, 134.5, 130.9, 130.4, 129.2, 129.1, 128.9, 128.8, 127.7, 126.2, 117.8, 21.3.

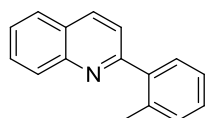

**2-(*o*-Tolyl)quinoline (3ac).**<sup>3</sup> Canary yellow solid (57.2 mg, 52%). <sup>1</sup>H NMR (400 MHz, CDCl<sub>3</sub>) δ 8.39 (d, *J* = 8.5 Hz, 1H), 8.31 (dd, *J* = 7.9, 1.1 Hz, 1H), 8.18 (d, *J* = 8.6 Hz, 1H), 8.11 (d, *J* = 8.5 Hz, 1H), 7.89 (d, *J* = 7.9 Hz, 1H), 7.80 – 7.74 (m, 1H), 7.70 – 7.62 (m, 1H), 7.50 (td, *J* = 7.5, 1.3 Hz, 1H), 7.42 (t, *J* = 7.7 Hz, 1H), 7.25 (d, *J* = 8.5 Hz, 1H), 2.56 (s, 3H). <sup>13</sup>C NMR (100 MHz, CDCl<sub>3</sub>) δ 158.2, 147.2, 139.1, 138.6, 137.2, 133.8, 132.4, 130.9, 130.6, 130.4, 129.1, 128.9, 127.7, 126.4, 117.7, 20.7.

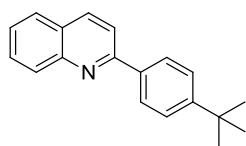

**2-(4-(Tert-butyl)phenyl)quinoline (3ad).**<sup>4</sup> Yellowish solid (80 mg, 62%). <sup>1</sup>H NMR (400 MHz, CDCl<sub>3</sub>) δ 8.36 (d, *J* = 8.5 Hz, 1H), 8.27 – 8.14 (m, 2H), 8.06 (d, *J* = 8.5 Hz, 2H), 7.87 (d, *J* = 8.1 Hz, 1H), 7.78 (t, *J* = 7.7 Hz, 1H), 7.65 (t, *J* = 7.5 Hz, 1H), 7.54 (d, *J* = 8.5 Hz, 2H), 1.30 (s, 9H). <sup>13</sup>C NMR (100 MHz, CDCl<sub>3</sub>) δ 158.4, 157.6, 147.4, 138.6, 136.2, 130.9, 130.4, 129.1, 128.8, 128.7, 127.7, 126.1, 117.8, 35.2, 31.0.

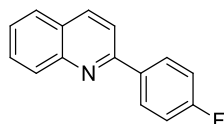

**2-(4-Fluorophenyl)quinoline (3ae).**<sup>4</sup> Yellowish solid (90.6 mg, 81%). <sup>1</sup>H NMR (400 MHz, CDCl<sub>3</sub>) δ 8.40 (d, *J* = 8.5 Hz, 1H), 8.23 – 8.12 (m, 4H), 7.89 (d, *J* = 8.2 Hz, 1H), 7.83 – 7.76 (m, 1H), 7.71 – 7.63 (m, 1H), 7.25 – 7.16 (m, 2H). <sup>13</sup>C NMR (100 MHz, CDCl<sub>3</sub>) δ 165.9 (d, *J* = 256.5 Hz), 158.0, 147.4, 138.8, 135.0, 132.0 (d, *J* = 9.7 Hz), 131.1, 130.3, 129.3, 128.9, 127.7, 117.4, 116.4 (d, *J* = 22.7 Hz). <sup>19</sup>F NMR (376 MHz, CDCl<sub>3</sub>) δ -103.39.

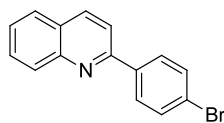

**2-(4-Bromophenyl)quinoline (3af).**<sup>4</sup> Yellowish solid (64.0 mg, 51%). <sup>1</sup>H NMR (400 MHz, CDCl<sub>3</sub>) δ 8.40 (d, *J* = 8.5 Hz, 1H), 8.20 (d, *J* = 8.5 Hz, 1H), 8.15 (d, *J* = 8.5 Hz, 1H), 8.01 (d, *J* = 8.5 Hz, 2H), 7.89 (d, *J* = 8.1 Hz, 1H), 7.80 (t, *J* = 7.6 Hz, 1H), 7.74 – 7.58 (m, 3H). <sup>13</sup>C NMR (100 MHz, CDCl<sub>3</sub>) δ 157.7, 147.4, 138.8, 138.0, 132.3, 131.1, 130.6, 130.3, 129.3, 129.2, 128.8, 127.7, 117.4.

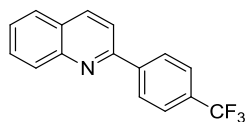

**2-(4-(Trifluoromethyl)phenyl)quinoline (3ag).**<sup>5</sup> Yellowish solid (56.0 mg, 41%). <sup>1</sup>H NMR (400 MHz, CDCl<sub>3</sub>) δ 8.43 (d, *J* = 8.5 Hz, 1H), 8.30 (d, *J* = 8.2 Hz, 2H), 8.25 (d, *J* = 8.5 Hz, 1H), 8.15 (d, *J* = 8.6 Hz, 1H), 7.90 (d, *J* = 8.2 Hz, 1H), 7.85 – 7.77 (m, 3H), 7.69 (dd, *J* = 11.1, 3.9 Hz, 1H). <sup>13</sup>C NMR (100 MHz, CDCl<sub>3</sub>) δ 157.3, 147.4, 142.6, 139.0, 135.2 (q, *J* = 33.1 Hz), 131.2, 130.2, 129.7,

129.5, 128.9, 127.7, 126.1 (q,  $J = 3.6$  Hz), 123.1 (q,  $J = 272.0$  Hz), 117.5.  $^{19}\text{F}$  NMR (376 MHz,  $\text{CDCl}_3$ )  $\delta$  -63.21.

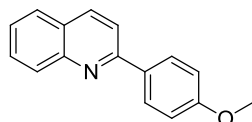

**2-(3-Methoxyphenyl)quinoline (3ah).**<sup>4</sup> Yellowish solid (32.9 mg, 28%).  $^1\text{H}$  NMR (400 MHz,  $\text{CDCl}_3$ )  $\delta$  8.36 (d,  $J = 8.5$  Hz, 1H), 8.18 (dd,  $J = 8.3, 5.7$  Hz, 2H), 8.07 (d,  $J = 8.7$  Hz, 2H), 7.87 (d,  $J = 8.2$  Hz, 1H), 7.78 (t,  $J = 7.7$  Hz, 1H), 7.65 (t,  $J = 7.5$  Hz, 1H), 7.00 (d,  $J = 8.7$  Hz, 2H), 3.84 (s, 3H).  $^{13}\text{C}$  NMR (100 MHz,  $\text{CDCl}_3$ )  $\delta$  163.9, 158.7, 147.4, 138.6, 131.3, 130.9, 130.5, 130.4, 129.0, 128.7, 127.7, 117.5, 114.4, 55.6.

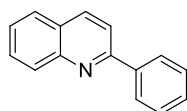

**2-Phenylquinoline (3ai).**<sup>4</sup> Yellowish solid (64 mg, 62%).  $^1\text{H}$  NMR (400 MHz,  $\text{CDCl}_3$ )  $\delta$  8.38 (d,  $J = 8.5$  Hz, 1H), 8.24 – 8.13 (m, 4H), 7.87 (d,  $J = 8.2$  Hz, 1H), 7.81 – 7.75 (m, 1H), 7.69 – 7.50 (m, 4H).  $^{13}\text{C}$  NMR (100 MHz,  $\text{CDCl}_3$ )  $\delta$  158.1, 147.4, 139.1, 138.7, 133.7, 131.0, 130.4, 129.2, 129.1, 129.0, 128.8, 127.7, 117.7.

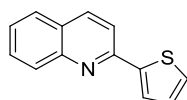

**2-(Thiophen-2-yl)quinoline (3aj).**<sup>3</sup> White solid (35 mg, 33%).  $^1\text{H}$  NMR (400 MHz,  $\text{CDCl}_3$ )  $\delta$  8.40 (d,  $J = 8.6$  Hz, 1H), 8.21 (d,  $J = 8.5$  Hz, 2H), 7.95 – 7.87 (m, 2H), 7.82 (dd,  $J = 11.3, 4.1$  Hz, 1H), 7.76 – 7.65 (m, 2H), 7.17 – 7.11 (m, 1H).  $^{13}\text{C}$  NMR (100 MHz,  $\text{CDCl}_3$ )  $\delta$  158.0, 147.4, 139.7, 138.8, 135.3, 135.2, 131.1, 130.3, 129.3, 128.9, 127.8, 127.7, 117.3.

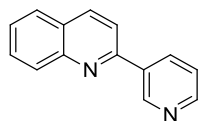

**2-(Pyridin-3-yl)quinoline (3ak).**<sup>3</sup> Yellowish solid (65.9 mg, 64%).  $^1\text{H}$  NMR (400 MHz,  $\text{CDCl}_3$ )  $\delta$  9.34 (d,  $J = 1.7$  Hz, 1H), 8.83 (dd,  $J = 4.9, 1.5$  Hz, 1H), 8.48 – 8.41 (m, 2H), 8.25 (d,  $J = 8.5$  Hz,



1H), 8.13 (d,  $J = 8.6$  Hz, 1H), 7.91 (d,  $J = 8.2$  Hz, 1H), 7.84 – 7.77 (m, 1H), 7.72 – 7.66 (m, 1H), 7.55 – 7.47 (m, 1H).  $^{13}\text{C}$  NMR (100 MHz,  $\text{CDCl}_3$ )  $\delta$  157.5, 154.1, 150.1, 147.4, 139.0, 136.9, 135.6, 131.3, 130.3, 129.5, 129.0, 127.8, 123.6, 117.3.

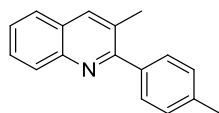

**3-Methyl-2-(p-tolyl)quinoline (3ba).**<sup>6</sup> Yellowish solid (76.9 mg, 67%).  $^1\text{H}$  NMR (400 MHz,  $\text{CDCl}_3$ )  $\delta$  8.04 (d,  $J = 2.8$  Hz, 1H), 7.98 – 7.89 (m, 3H), 7.79 – 7.72 (m, 1H), 7.68 – 7.54 (m, 2H), 7.39 – 7.32 (m, 2H), 2.86 (d,  $J = 3.8$  Hz, 3H), 2.46 (d,  $J = 3.8$  Hz, 3H).  $^{13}\text{C}$  NMR (100 MHz,  $\text{CDCl}_3$ )  $\delta$  157.0, 144.6, 144.4, 139.8, 135.8, 129.9, 129.7, 129.4, 129.3, 129.1, 128.9, 128.5, 126.6, 21.6, 18.8.

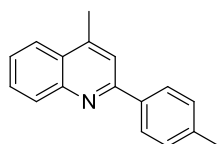

**4-Methyl-2-(p-tolyl)quinoline (3ca).**<sup>6</sup> Yellowish solid (83.3 mg, 72%).  $^1\text{H}$  NMR (400 MHz,  $\text{CDCl}_3$ )  $\delta$  8.16 (d,  $J = 8.5$  Hz, 1H), 8.05 – 7.98 (m, 4H), 7.78 – 7.72 (m, 1H), 7.69 – 7.63 (m, 1H), 7.32 (d,  $J = 8.1$  Hz, 2H), 2.78 (s, 3H), 2.40 (s, 3H).  $^{13}\text{C}$  NMR (100 MHz,  $\text{CDCl}_3$ )  $\delta$  158.0, 147.8, 147.2, 144.6, 136.3, 131.1, 130.5, 129.7, 129.0, 128.8, 128.7, 123.8, 118.0, 21.6, 19.1.

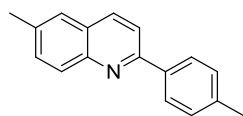

**6-Methyl-2-(p-tolyl)quinoline (3da).**<sup>3</sup> Yellowish solid (83.3 mg, 72%).  $^1\text{H}$  NMR (400 MHz,  $\text{CDCl}_3$ )  $\delta$  8.25 (d,  $J = 8.5$  Hz, 1H), 8.14 (d,  $J = 8.5$  Hz, 1H), 8.03 (dd,  $J = 17.9, 8.4$  Hz, 3H), 7.64 – 7.58 (m, 2H), 7.32 (d,  $J = 8.1$  Hz, 2H), 2.54 (s, 3H), 2.39 (s, 3H).  $^{13}\text{C}$  NMR (100 MHz,  $\text{CDCl}_3$ )  $\delta$  157.5, 146.1, 144.6, 139.5, 137.7, 136.4, 133.3, 130.0, 129.7, 129.0, 128.9, 126.4, 117.7, 21.7, 21.6. **HRMS (EI)** Calcd for  $\text{C}_{17}\text{H}_{15}\text{N}$  [ $\text{M}^+$ ]: 233.1204 Found:  $m/z$  233.1199.

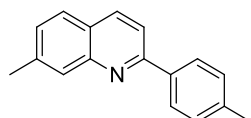

**7-Methyl-2-(*p*-tolyl)quinoline (3ea).** Yellowish solid (74.1 mg, 62%).  $^1\text{H NMR}$  (400 MHz,  $\text{CDCl}_3$ )  $\delta$  8.30 (d,  $J = 8.5$  Hz, 1H), 8.12 (d,  $J = 8.5$  Hz, 1H), 8.01 (d,  $J = 8.3$  Hz, 2H), 7.94 (s, 1H), 7.75 (d,  $J = 8.4$  Hz, 1H), 7.47 (dd,  $J = 8.4, 1.3$  Hz, 1H), 7.32 (d,  $J = 8.1$  Hz, 2H), 2.54 (s, 3H), 2.39 (s, 3H).  $^{13}\text{C NMR}$  (100 MHz,  $\text{CDCl}_3$ )  $\delta$  158.3, 147.7, 144.6, 141.6, 138.2, 136.3, 131.4, 129.7, 129.2, 129.0, 127.2, 126.9, 116.8, 21.8, 21.6. **HRMS (ESI)** Calcd for  $\text{C}_{17}\text{H}_{16}\text{N}$  [ $\text{M}+\text{H}^+$ ]: 234.1277 Found:  $m/z$  234.1284.

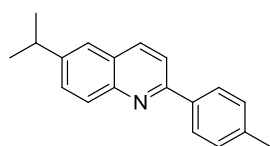

**6-Isopropyl-2-(*p*-tolyl)quinoline (3fa).** Yellowish solid (84.0 mg, 66%).  $^1\text{H NMR}$  (400 MHz,  $\text{CDCl}_3$ )  $\delta$  8.29 (d,  $J = 8.5$  Hz, 1H), 8.13 (dd,  $J = 20.3, 8.7$  Hz, 2H), 8.00 (d,  $J = 8.3$  Hz, 2H), 7.71 – 7.62 (m, 2H), 7.31 (d,  $J = 8.1$  Hz, 2H), 3.13 – 3.06 (m, 1H), 2.39 (s, 3H), 1.33 (d,  $J = 6.9$  Hz, 6H).  $^{13}\text{C NMR}$  (100 MHz,  $\text{CDCl}_3$ )  $\delta$  157.5, 150.2, 146.4, 144.6, 138.1, 136.5, 131.0, 130.2, 129.7, 129.0, 128.9, 123.6, 117.7, 34.2, 23.6, 21.6. **HRMS (ESI)** Calcd for  $\text{C}_{19}\text{H}_{20}\text{N}$  [ $\text{M}+\text{H}^+$ ]: 262.1590 Found:  $m/z$  262.1589.

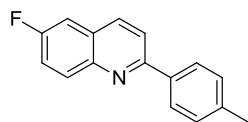

**6-Fluoro-2-(*p*-tolyl)quinoline (3ga).** Yellowish solid (72 mg, 61%).  $^1\text{H NMR}$  (400 MHz,  $\text{CDCl}_3$ )  $\delta$  8.32 (d,  $J = 8.6$  Hz, 1H), 8.25 – 8.14 (m, 2H), 8.01 (d,  $J = 8.2$  Hz, 2H), 7.61 – 7.52 (m, 1H), 7.48 (dd,  $J = 8.5, 2.6$  Hz, 1H), 7.34 (d,  $J = 8.1$  Hz, 2H), 2.41 (s, 3H).  $^{13}\text{C NMR}$  (100 MHz,  $\text{CDCl}_3$ )  $\delta$  144.7 (d,  $J = 148.0$  Hz), 138.0, 137.9, 136.0, 133.2, 133.1, 129.8, 129.1, 121.7, 121.4, 118.5, 110.9, 110.6, 21.6.  $^{19}\text{F NMR}$  (376 MHz,  $\text{CDCl}_3$ )  $\delta$  -108.40. **HRMS (ESI)** Calcd for  $\text{C}_{16}\text{H}_{13}\text{FN}$  [ $\text{M}+\text{H}^+$ ]: 238.1207 Found:  $m/z$  238.1209.

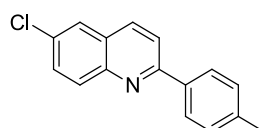

**6-Chloro-2-(p-tolyl)quinoline (3ha).**<sup>7</sup> Yellowish solid (38.0 mg, 30%). <sup>1</sup>H NMR (400 MHz, CDCl<sub>3</sub>) δ 8.28 (d, *J* = 8.6 Hz, 1H), 8.21 (d, *J* = 8.6 Hz, 1H), 8.10 (d, *J* = 9.1 Hz, 1H), 8.01 (d, *J* = 8.3 Hz, 2H), 7.86 (d, *J* = 2.2 Hz, 1H), 7.71 (dd, *J* = 9.1, 2.3 Hz, 1H), 7.34 (d, *J* = 8.1 Hz, 2H), 2.41 (s, 3H). <sup>13</sup>C NMR (100 MHz, CDCl<sub>3</sub>) δ 158.7, 145.8, 145.0, 137.7, 135.9, 135.2, 132.0, 131.9, 129.8, 129.3, 129.1, 126.3, 118.6, 21.6.

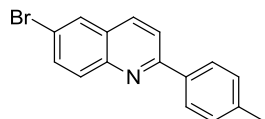

**6-Bromo-2-(p-tolyl)quinoline (3ia).** Yellowish solid (92 mg, 62%). <sup>1</sup>H NMR (400 MHz, CDCl<sub>3</sub>) δ 8.24 (dd, *J* = 26.6, 8.6 Hz, 2H), 8.08 – 7.97 (m, 4H), 7.84 (dd, *J* = 9.0, 1.9 Hz, 1H), 7.34 (d, *J* = 8.1 Hz, 2H), 2.41 (s, 3H). <sup>13</sup>C NMR (100 MHz, CDCl<sub>3</sub>) δ 158.8, 146.0, 145.0, 137.6, 135.8, 134.5, 131.9, 129.8, 129.7, 129.1, 123.5, 118.6, 21.6. HRMS (EI) Calcd for C<sub>16</sub>H<sub>12</sub>BrN [M]<sup>+</sup>: 297.0153 Found: m/z 297.0158.

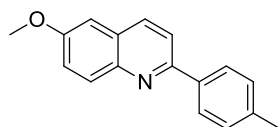

**6-Methoxy-2-(p-tolyl)quinoline (3ja).** Yellowish solid (71 mg, 57%). <sup>1</sup>H NMR (400 MHz, CDCl<sub>3</sub>) δ 8.20 (d, *J* = 8.6 Hz, 1H), 8.12 (d, *J* = 8.5 Hz, 1H), 8.02 (dd, *J* = 15.9, 8.7 Hz, 3H), 7.47 – 7.37 (m, 1H), 7.29 (t, *J* = 8.8 Hz, 2H), 7.08 (d, *J* = 2.5 Hz, 1H), 3.93 (s, 3H), 2.38 (s, 3H). <sup>13</sup>C NMR (100 MHz, CDCl<sub>3</sub>) δ 159.8, 155.8, 144.6, 143.6, 136.8, 136.6, 131.8, 130.4, 129.7, 128.9, 124.2, 118.2, 104.7, 55.7, 21.6. HRMS (EI) Calcd for C<sub>17</sub>H<sub>15</sub>NO [M]<sup>+</sup>: 249.1154 Found: m/z 249.1160.

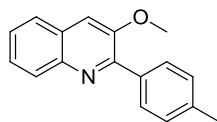

**3-Methoxy-2-(p-tolyl)quinoline (3ka).** <sup>1</sup>H NMR (400 MHz, CDCl<sub>3</sub>) δ 8.11 (d, *J* = 9.0 Hz, 1H), 7.96 (d, *J* = 8.1 Hz, 2H), 7.74 (dd, *J* = 5.9, 3.1 Hz, 1H), 7.58 (dd, *J* = 12.2, 8.4 Hz, 3H), 7.32 (d, *J* = 8.1 Hz, 2H), 3.96 (s, 3H), 2.44 (s, 3H). <sup>13</sup>C NMR (100 MHz, CDCl<sub>3</sub>) δ 150.4, 148.8, 144.5,

141.3, 136.4, 130.9, 130.4, 129.5, 129.4, 129.2 128.0, 126.2, 116.1, 56.1, 21.6. **HRMS (EI)** Calcd for C<sub>17</sub>H<sub>15</sub>NO [**M**<sup>+</sup>]: 249.1154 Found: m/z 249.1162.

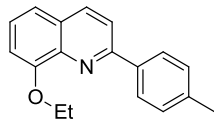

**8-Ethoxy-2-(p-tolyl)quinoline (3la).** Yellowish solid (89 mg, 68%). <sup>1</sup>H NMR (400 MHz, CDCl<sub>3</sub>) δ 8.30 (d, *J* = 8.5 Hz, 1H), 8.18 (d, *J* = 8.5 Hz, 1H), 8.09 (d, *J* = 8.1 Hz, 2H), 7.52 (t, *J* = 8.0 Hz, 1H), 7.40 (d, *J* = 8.2 Hz, 1H), 7.33 (d, *J* = 8.0 Hz, 2H), 7.07 (d, *J* = 7.7 Hz, 1H), 4.21 (q, *J* = 6.9 Hz, 2H), 2.41 (s, 3H), 1.53 (t, *J* = 6.9 Hz, 3H). <sup>13</sup>C NMR (100 MHz, CDCl<sub>3</sub>) δ 157.2, 155.5, 144.6, 139.6, 138.2, 136.0, 130.1, 129.6, 129.5, 129.3, 119.2, 117.5, 111.1, 65.0, 21.6, 14.7. **HRMS (EI)** Calcd for C<sub>18</sub>H<sub>17</sub>NO [**M**<sup>+</sup>]: 263.1310 Found: m/z 263.1318

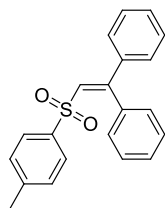

**(2-Tosylethene-1,1-diyl)dibenzene (5a).** <sup>1</sup>H NMR (400 MHz, CDCl<sub>3</sub>) δ 7.47 (d, *J* = 8.0 Hz, 2H), 7.36 (dd, *J* = 13.4, 6.9 Hz, 2H), 7.29 (t, *J* = 7.3 Hz, 4H), 7.20 (d, *J* = 7.8 Hz, 2H), 7.12 (dd, *J* = 18.3, 7.8 Hz, 4H), 6.99 (s, 1H), 2.36 (s, 3H). <sup>13</sup>C NMR (100 MHz, CDCl<sub>3</sub>) δ 154.6, 143.7, 139.1, 138.5, 135.5, 130.1, 129.7, 129.2, 128.9, 128.7, 128.5, 128.1, 127.7, 127.6, 21.5.

## References:

- [1]. X. Yu, S. Yang, Y. Zhang, M. Guo, Y. Yamamoto and M. Bao, *Org. Lett.*, **2017**, **19**, 6088-6091.
- [2].G. Chen, X. Zhang, Z. Zeng, W. Peng, Q. Liang and J. Liu, *ChemistrySelect*, **2017**, **2**, 1979-1982.
- [3].X. Xu, X. Zhang, W. Liu, Q. Zhao, Z. Wang, L. Yu and F. Shi, *Tetrahedron. Lett.*, **2015**, **56**, 3790-3792.
- [4].L.-Y. Xi, R.-Y. Zhang, L. Zhang, S.-Y. Chen and X.-Q. Yu, *Org. Biomol. Chem.*, **2015**, **13**, 3924-3930.
- [5].H. J. Jeong, S. Chae, K. Jeong and S. K. Namgoong, *Eur. J. Org. Chem.*, **2018**, 6343-6349.
- [6].S.-j. Chen, G.-p. Lu and C. Cai, *Synthesis*, **2015**, **47**, 976-984.
- [7].R. Wang and J. R. Falck, *Org. Chem. Front.*, **2014**, **1**, 1029-1034.
- [8].S. Mao, Y.-R. Gao, X.-Q. Zhu, D.-D. Guo and Y.-Q. Wang, *Org. Lett.*, **2015**, **17**, 1692-1695.

# Copies of $^1\text{H}$ NMR, $^{13}\text{C}$ NMR and $^{19}\text{F}$ NMR spectra

## 2-(*p*-Tolyl)quinolone (3aa)

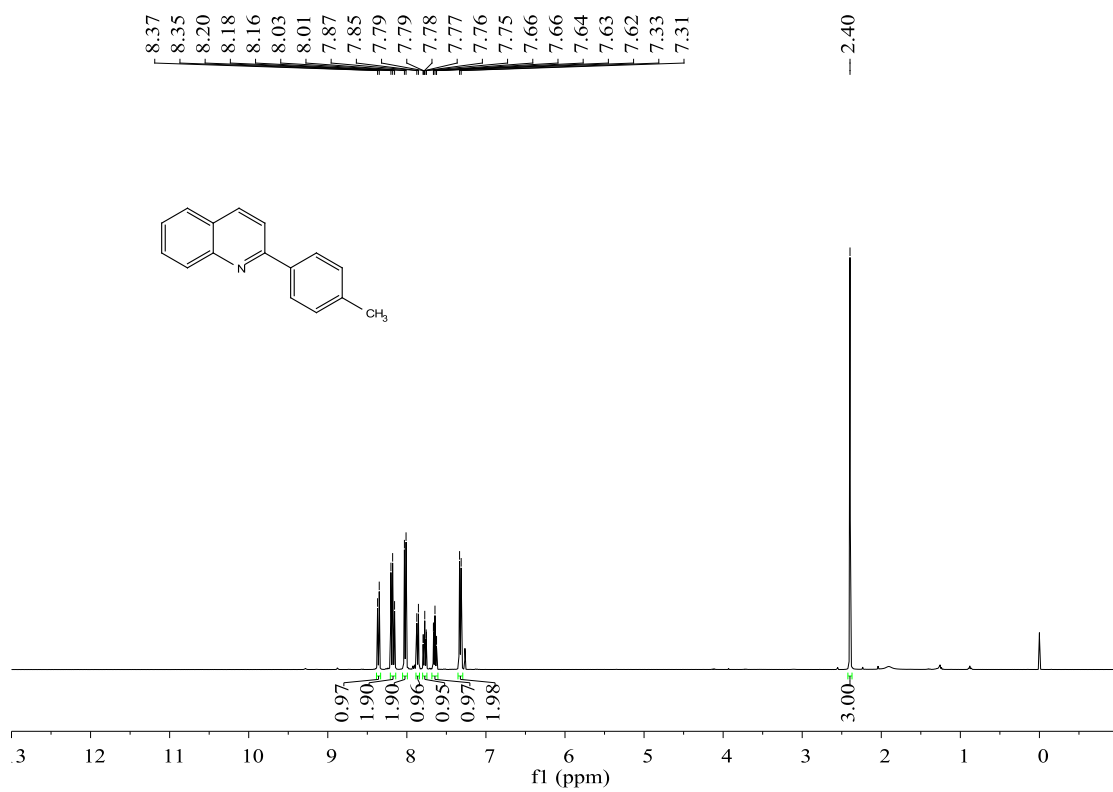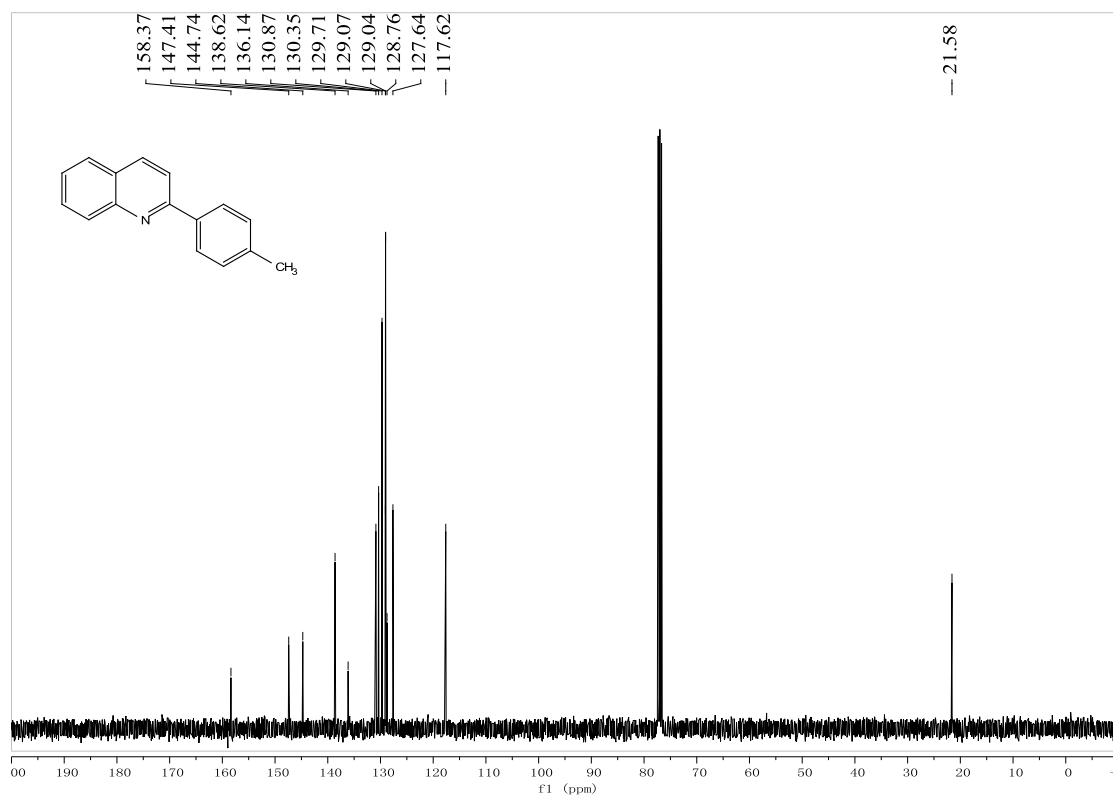

2-(*m*-Olyl)quinolone (3ab)

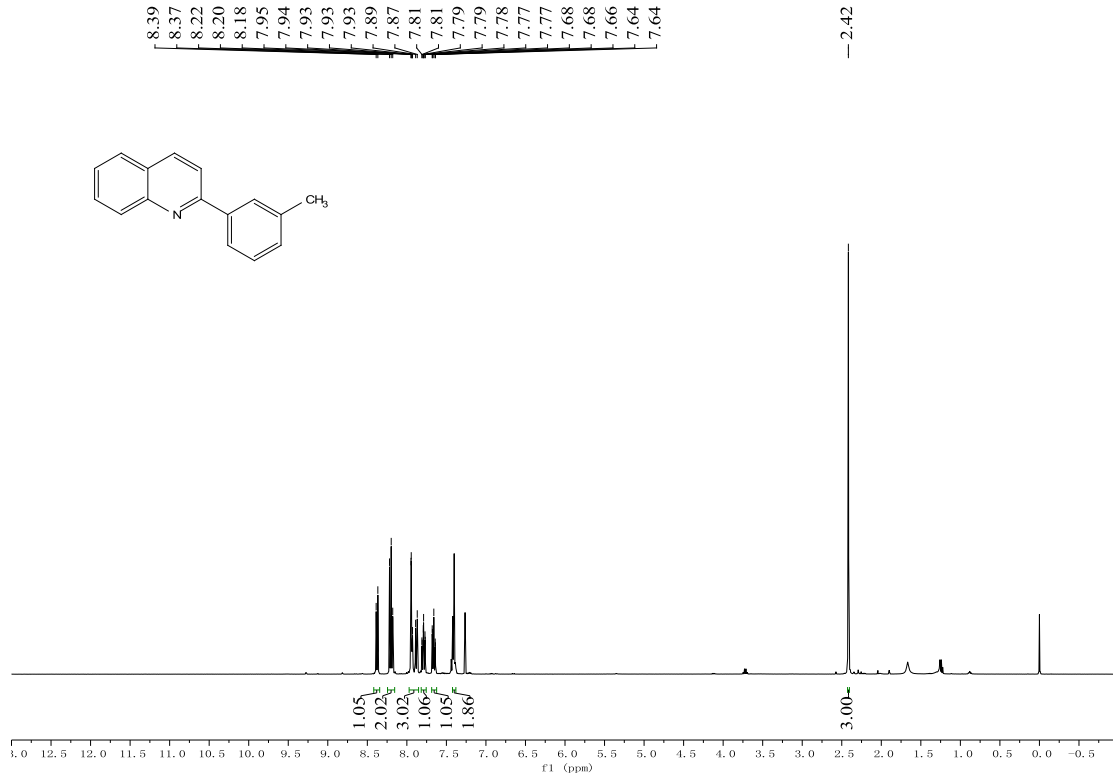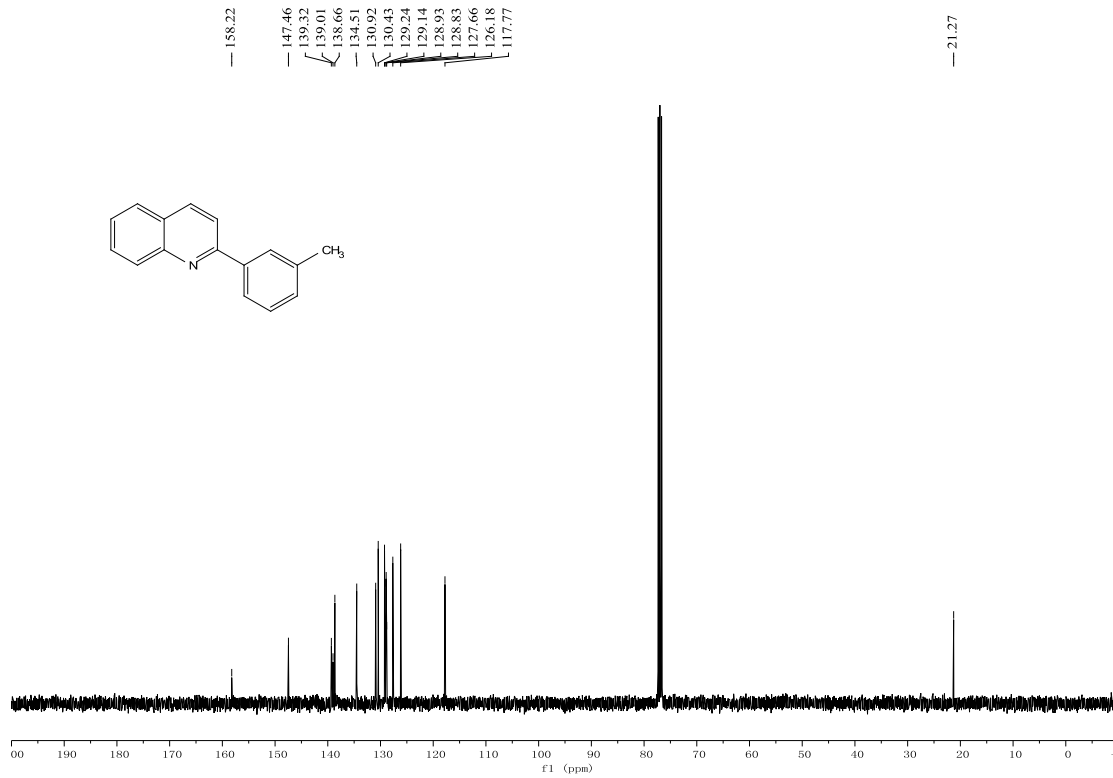

### 2-(*o*-Tolyl)quinolone (3ac)

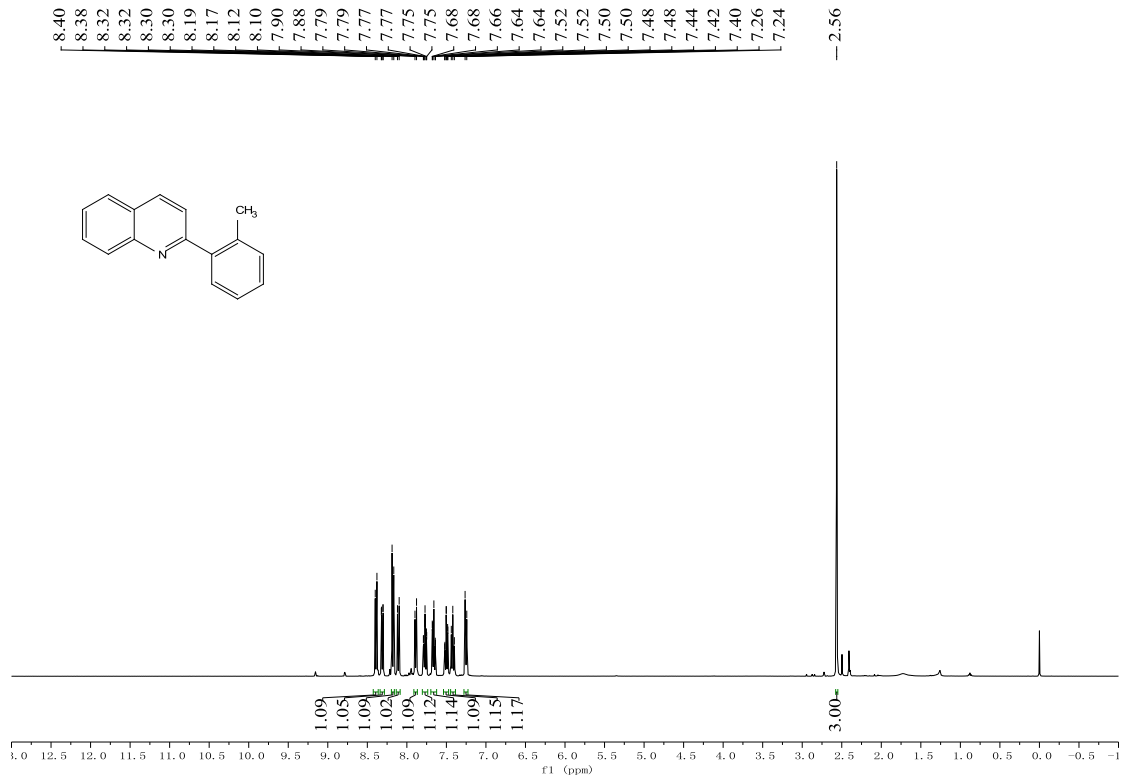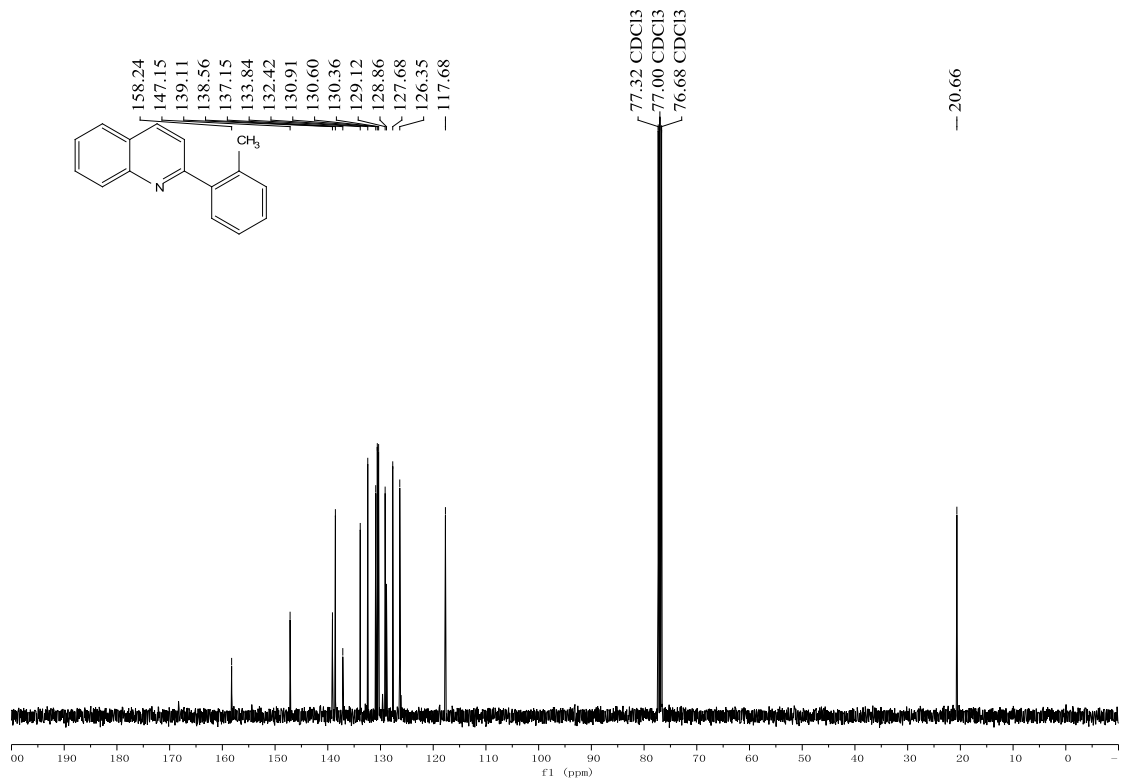



### 2-(4-(Tert-butyl)phenyl)quinoline (3ad)

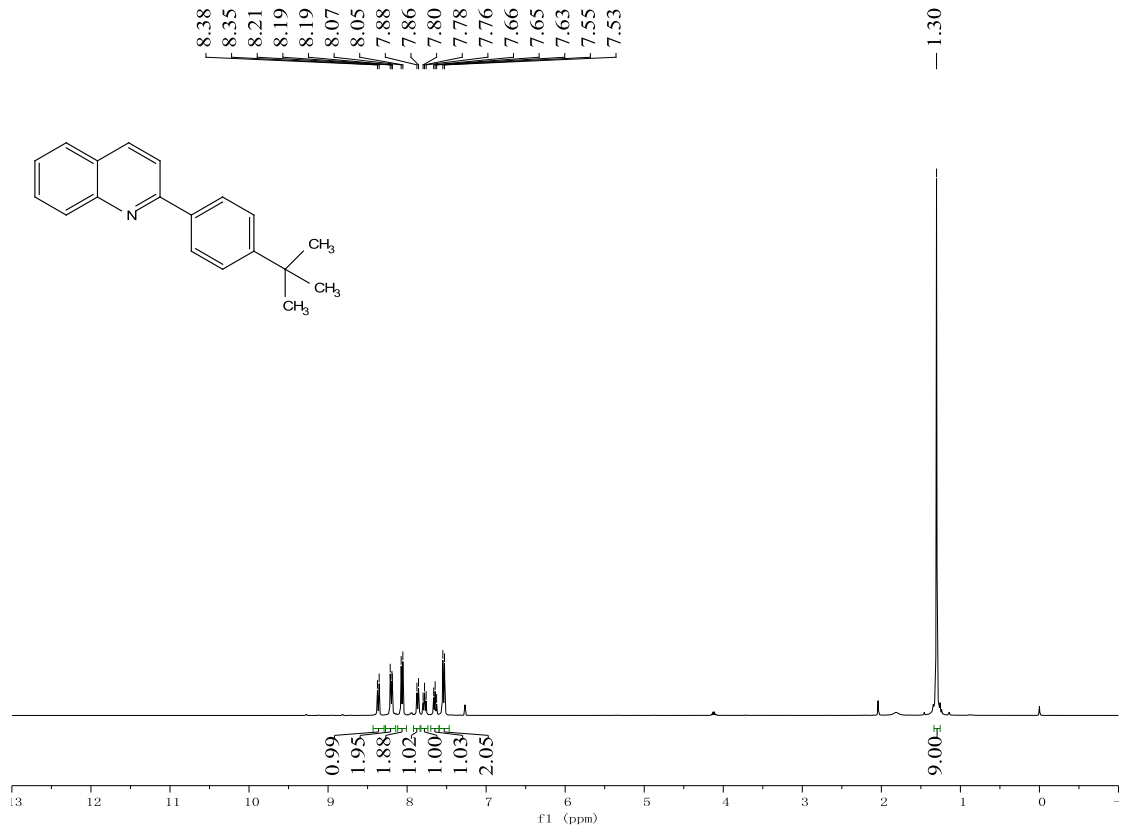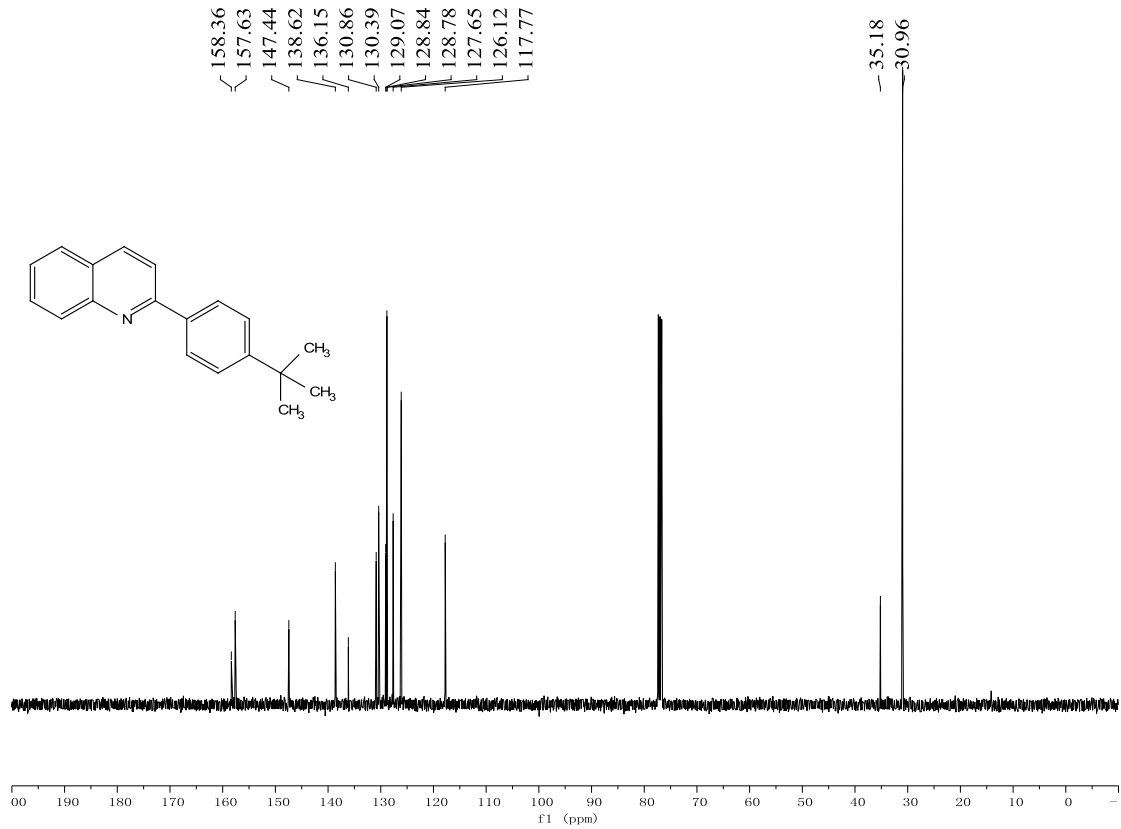

### 2-(4-Fluorophenyl)quinolone (3ae)

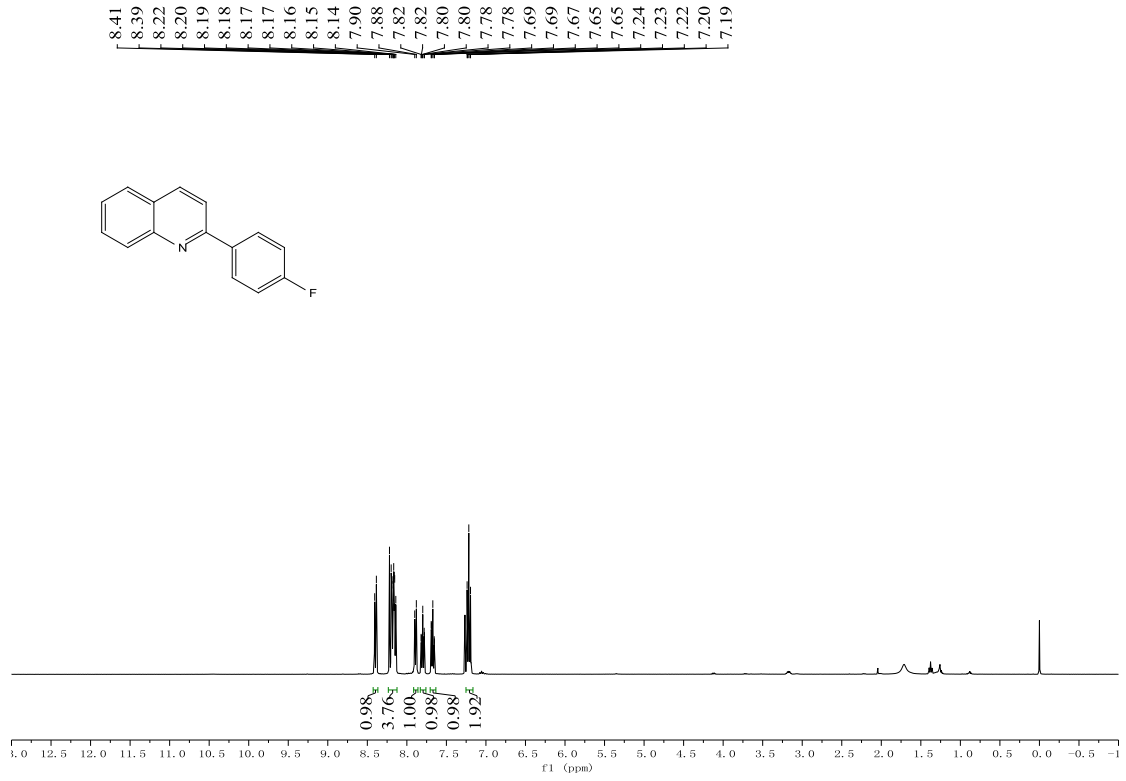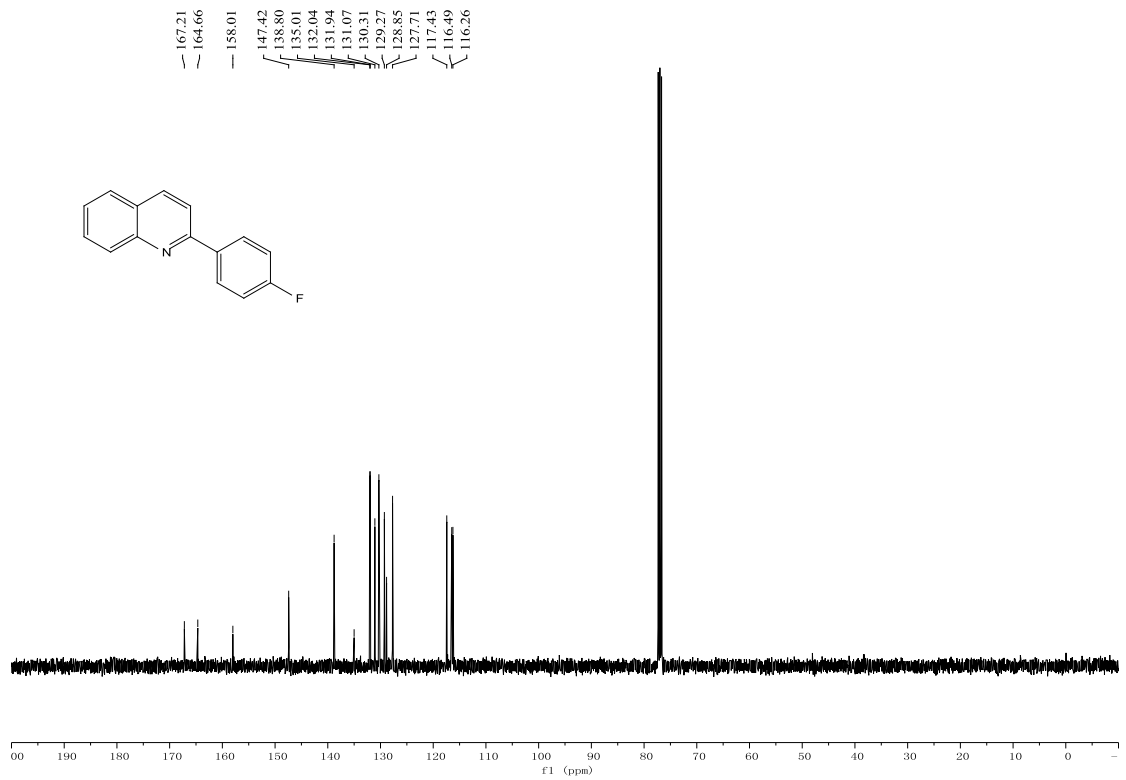

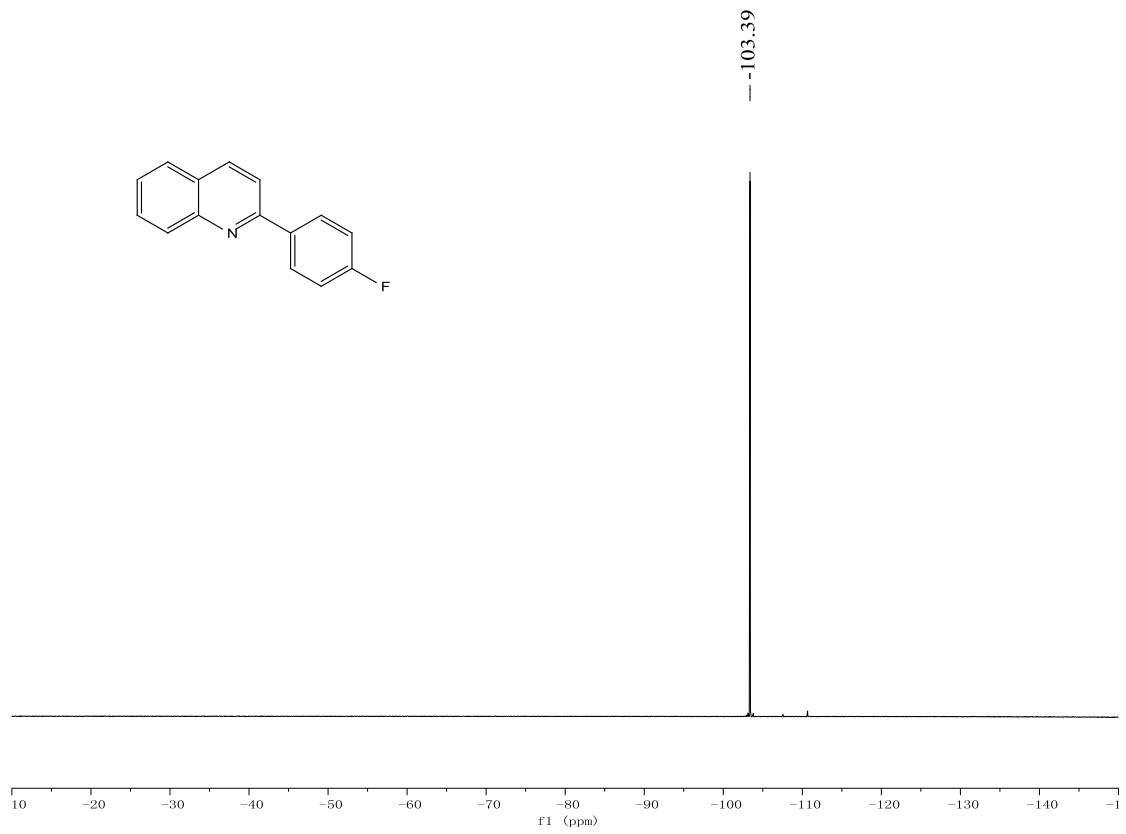

2-((4-Bromophenyl)sulfonyl)quinoline (3af)

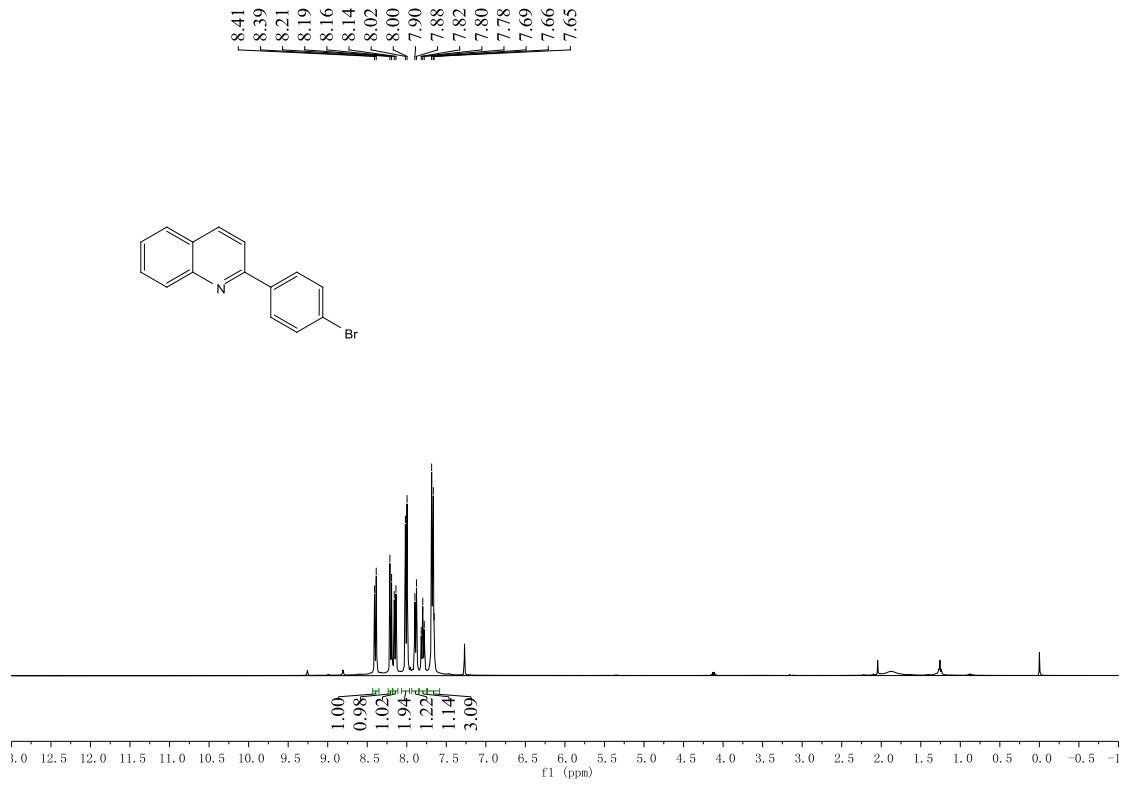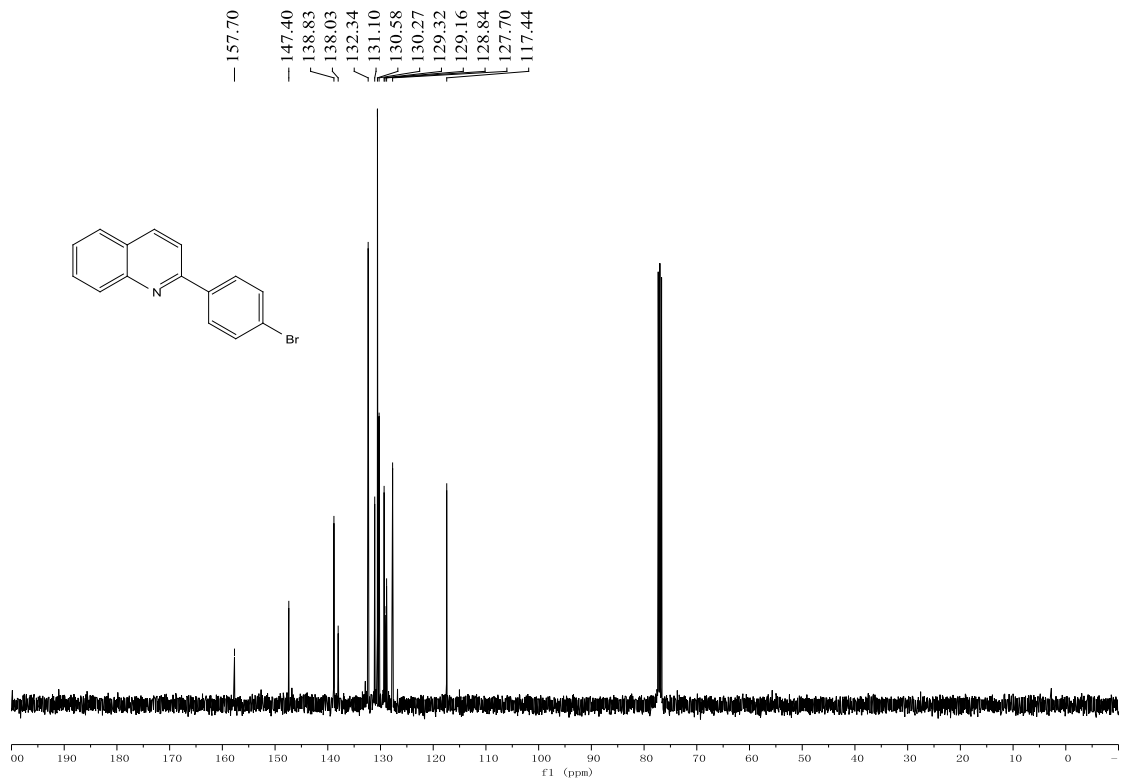

### 2-(4-(Trifluoromethyl)phenyl)quinolone (3ag)

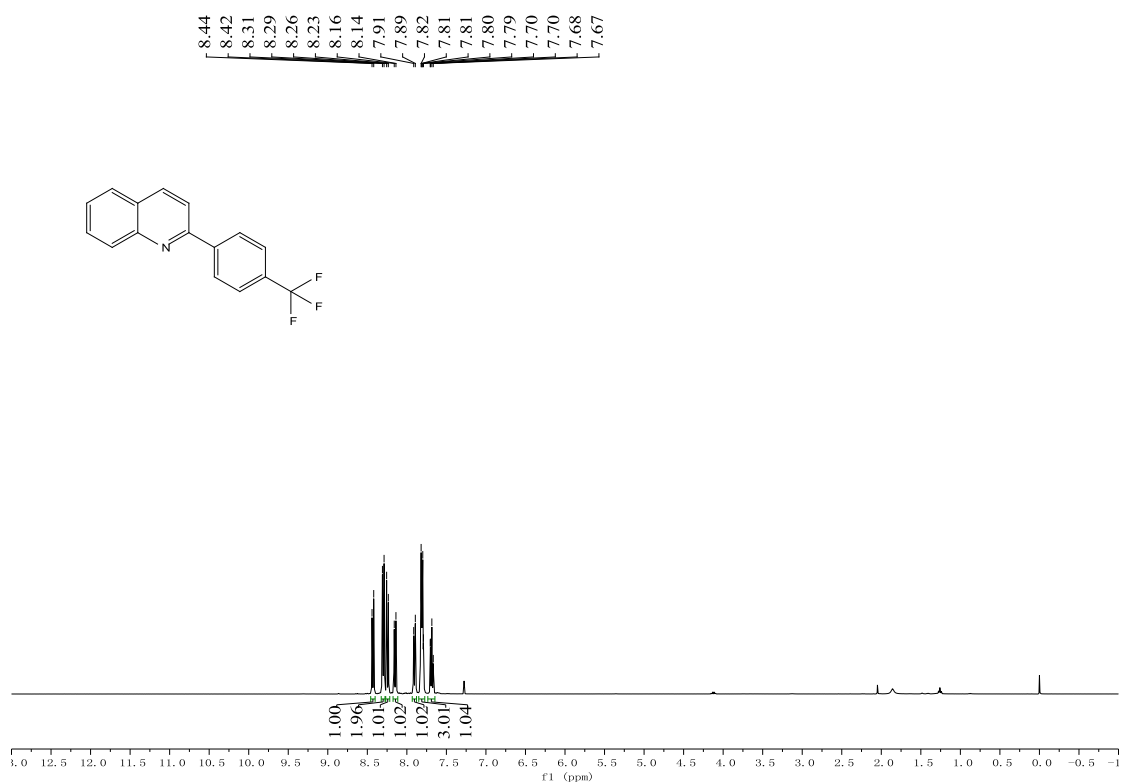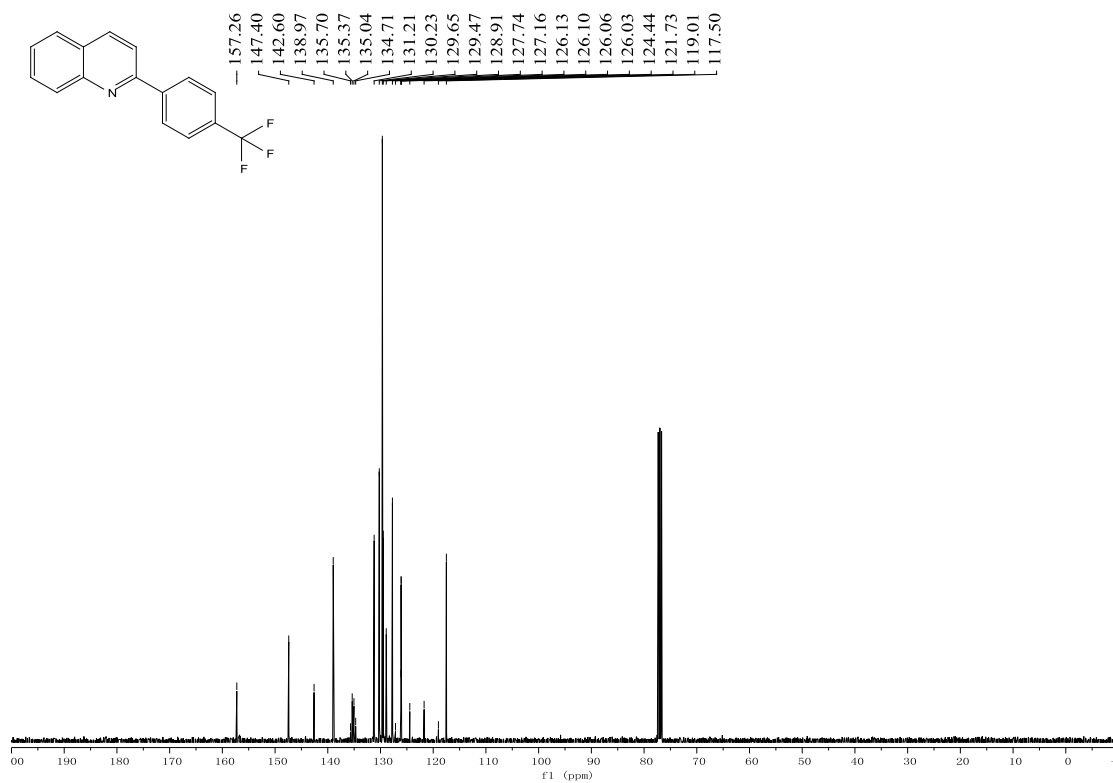

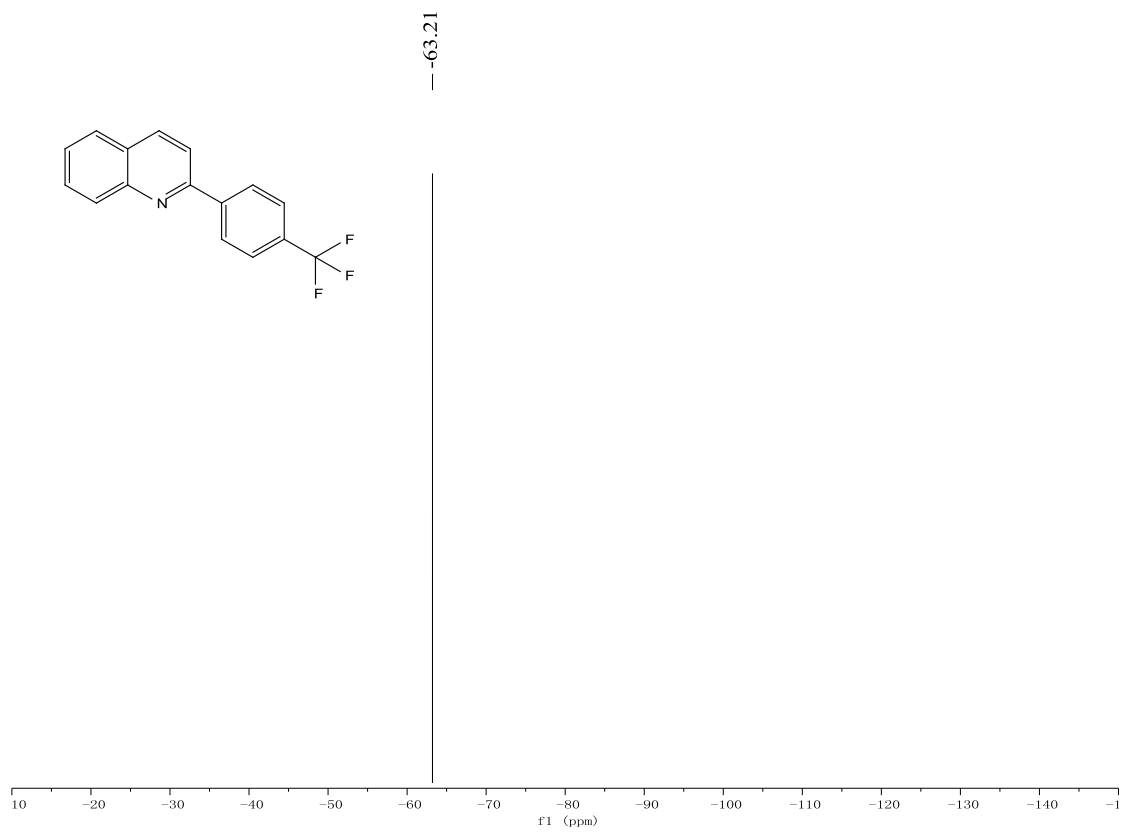

### 2-(4-Methoxyphenyl)quinoline (3ah)

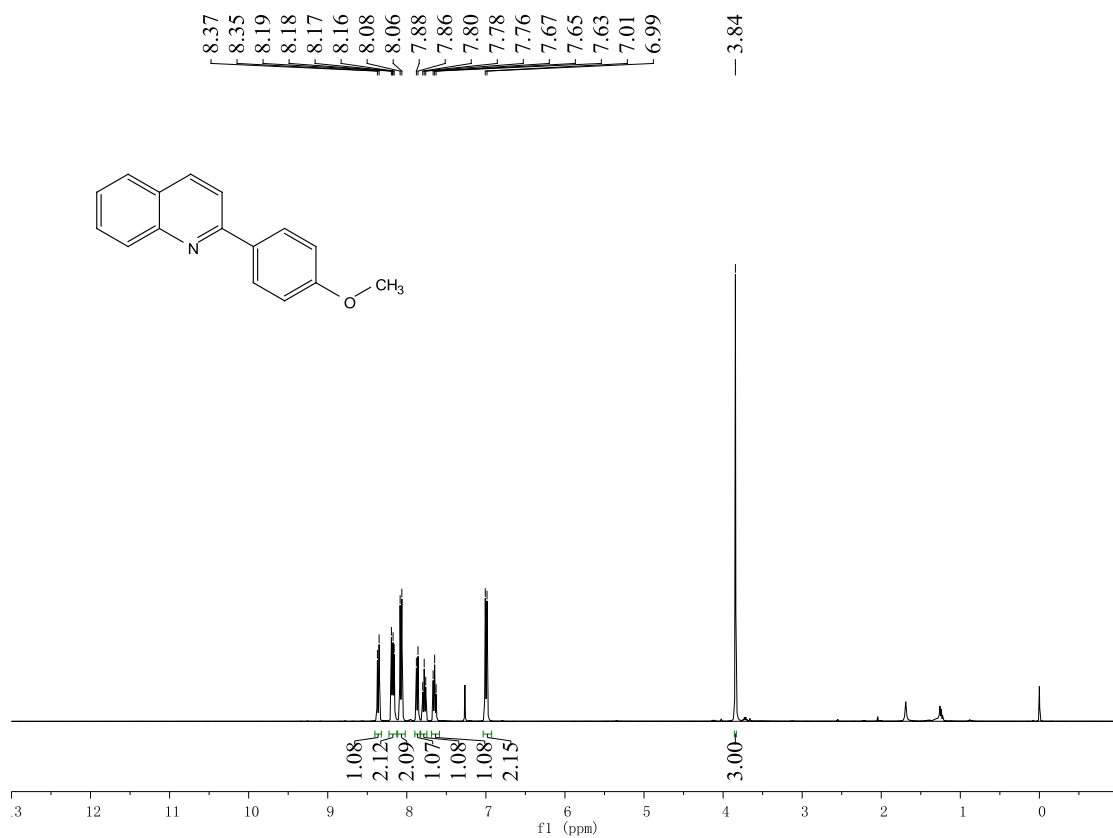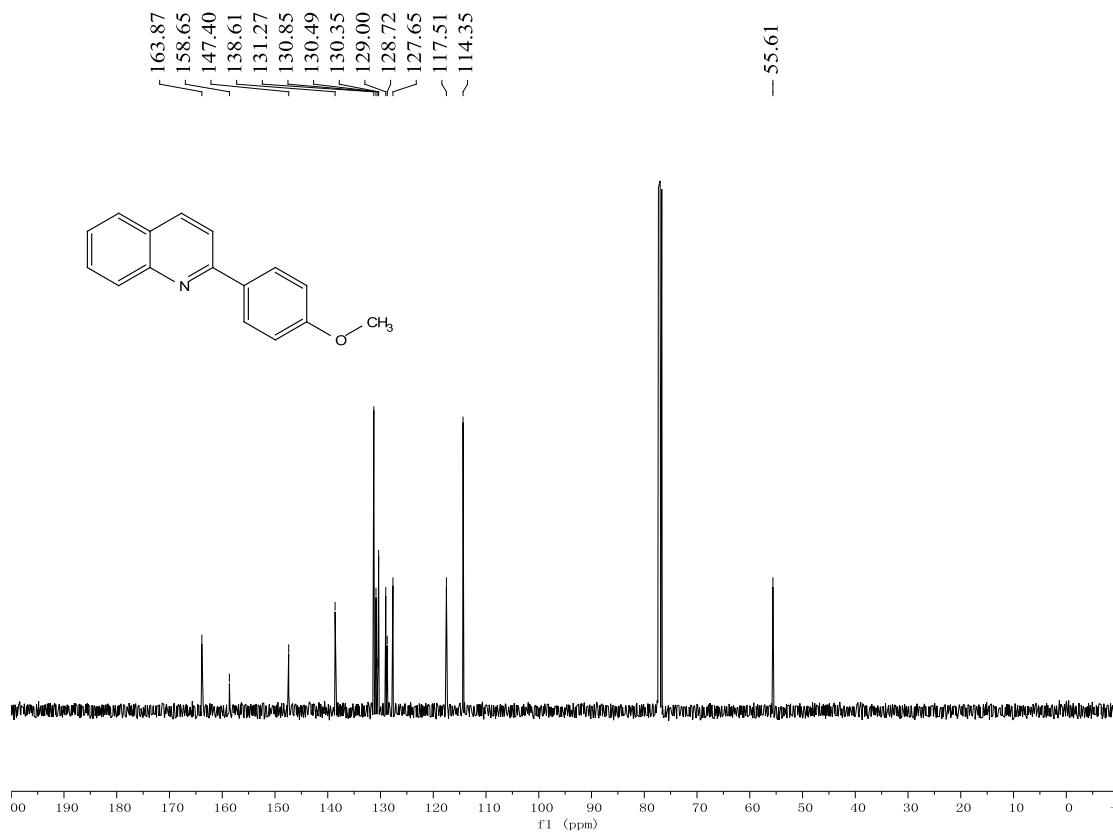

### 2-Phenylquinoline (3ai)

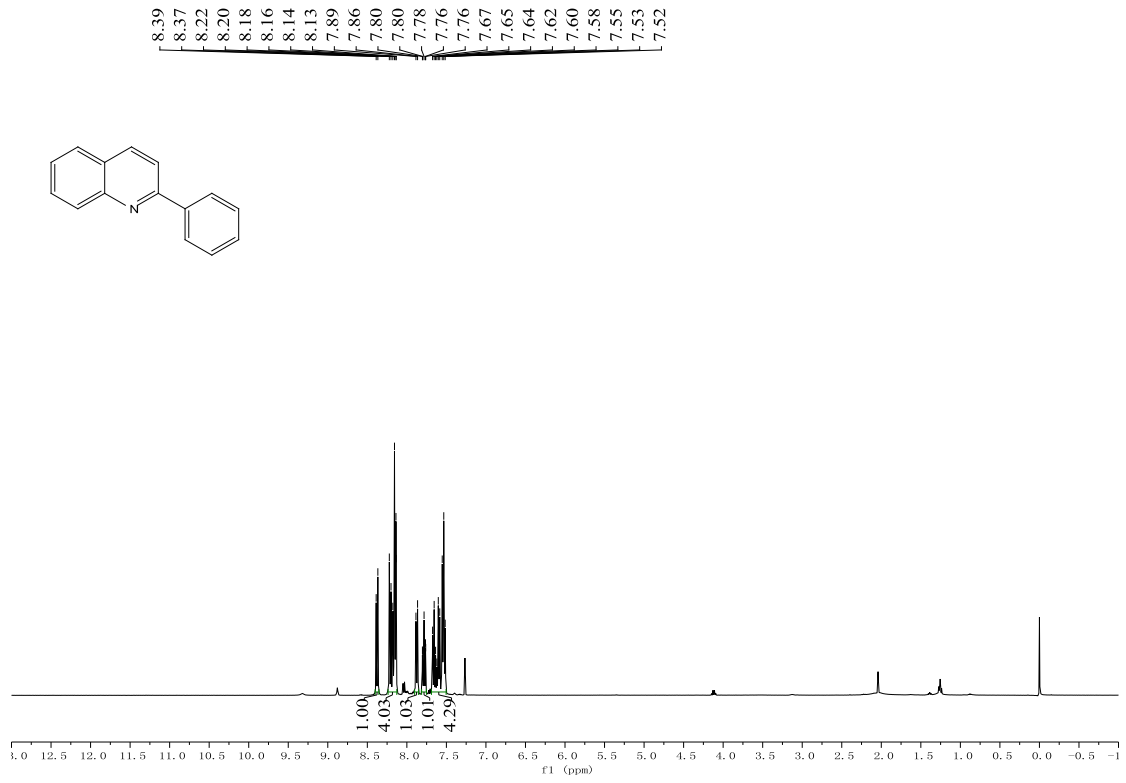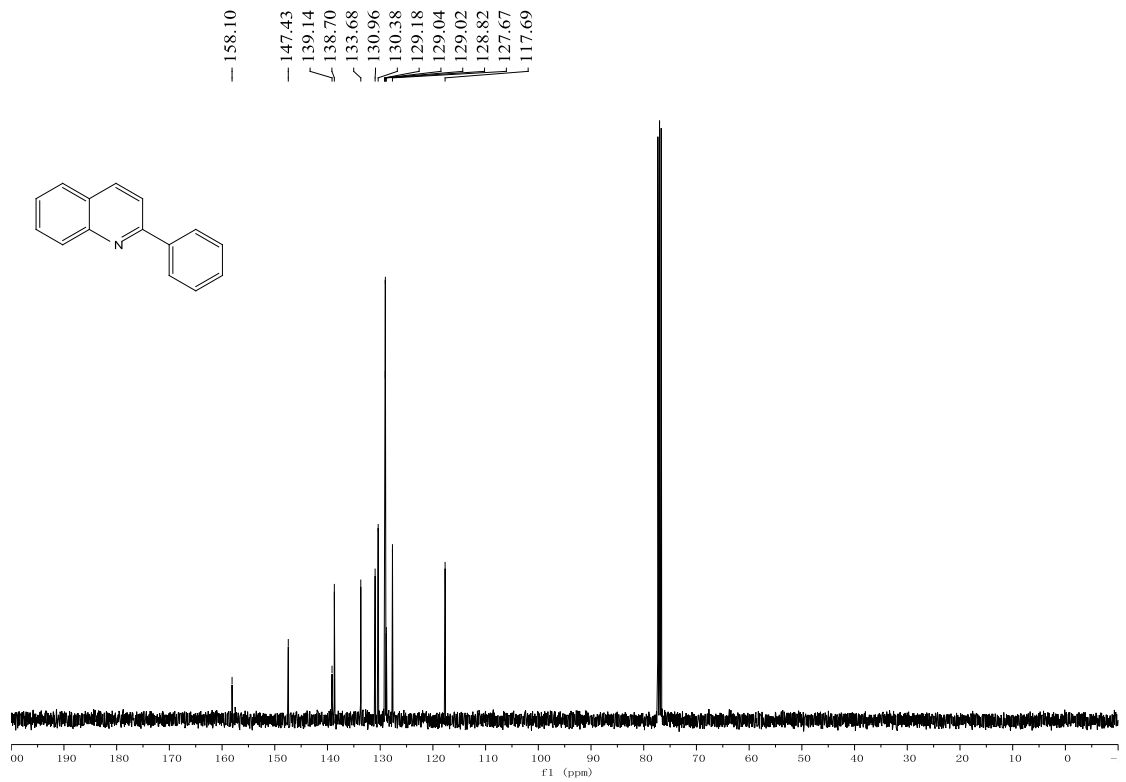



### 2-(Thiophen-2-yl)quinoline (3aj)

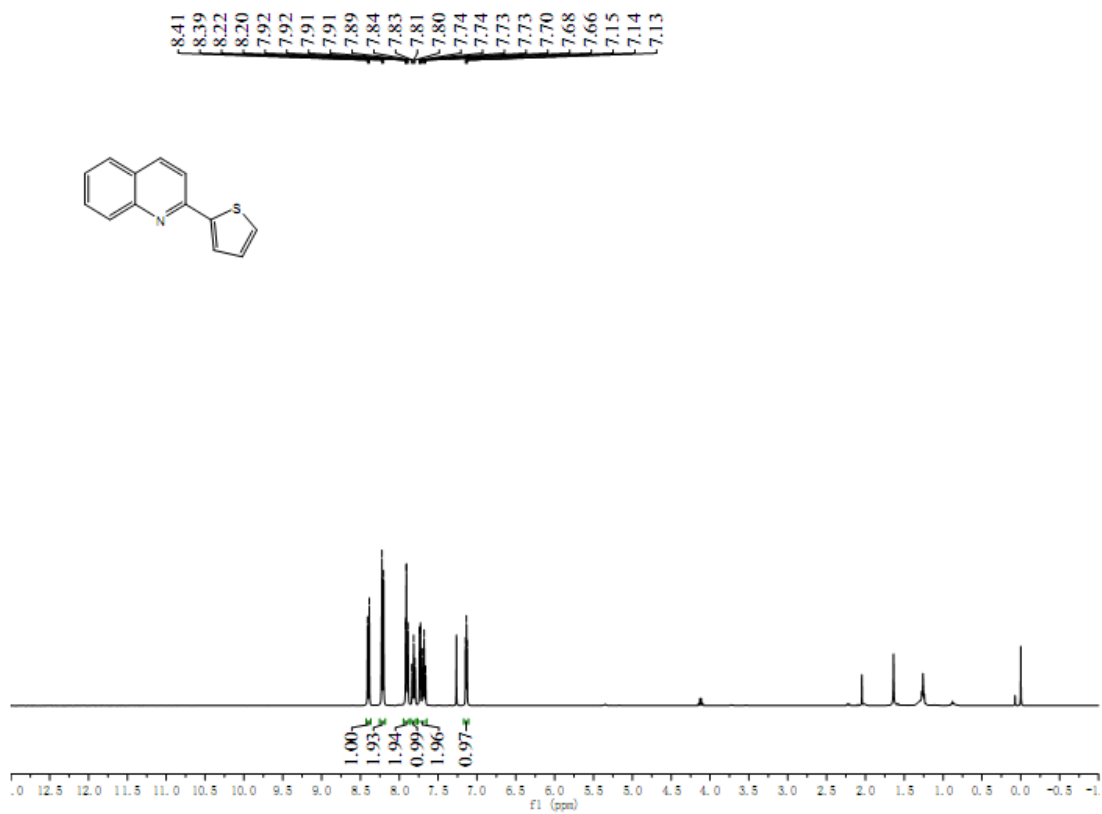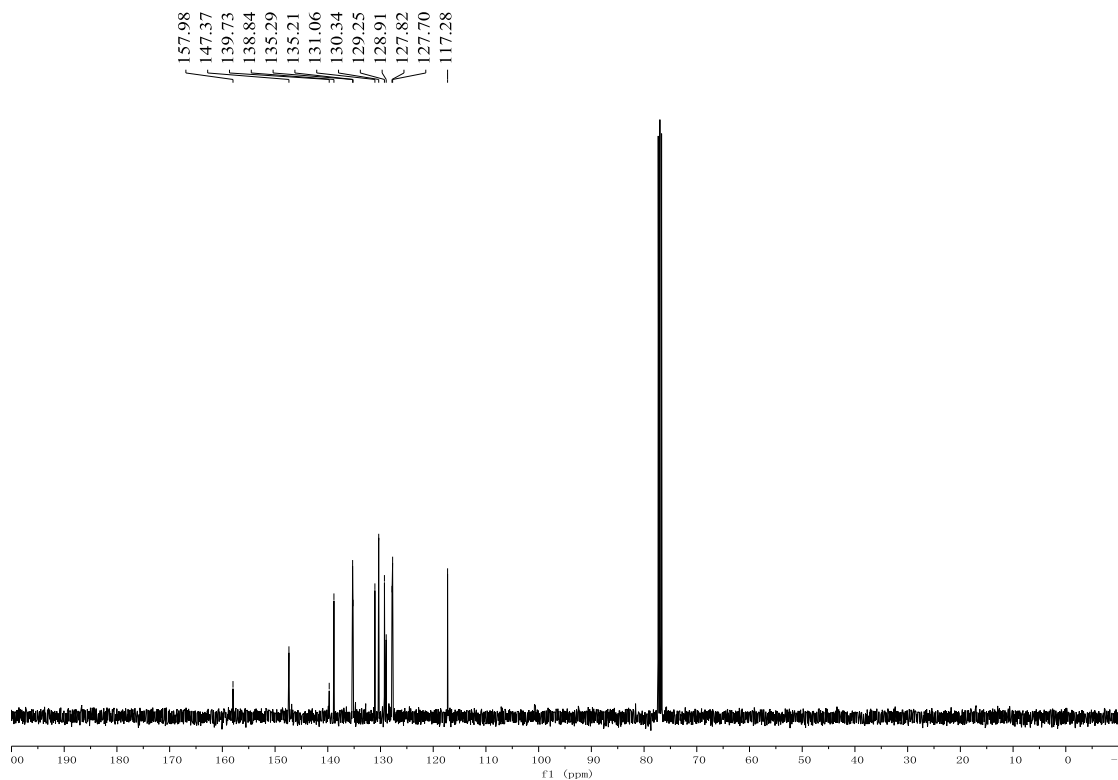

### 3-Methyl-2-(phenylsulfonyl)quinolone (3ak)

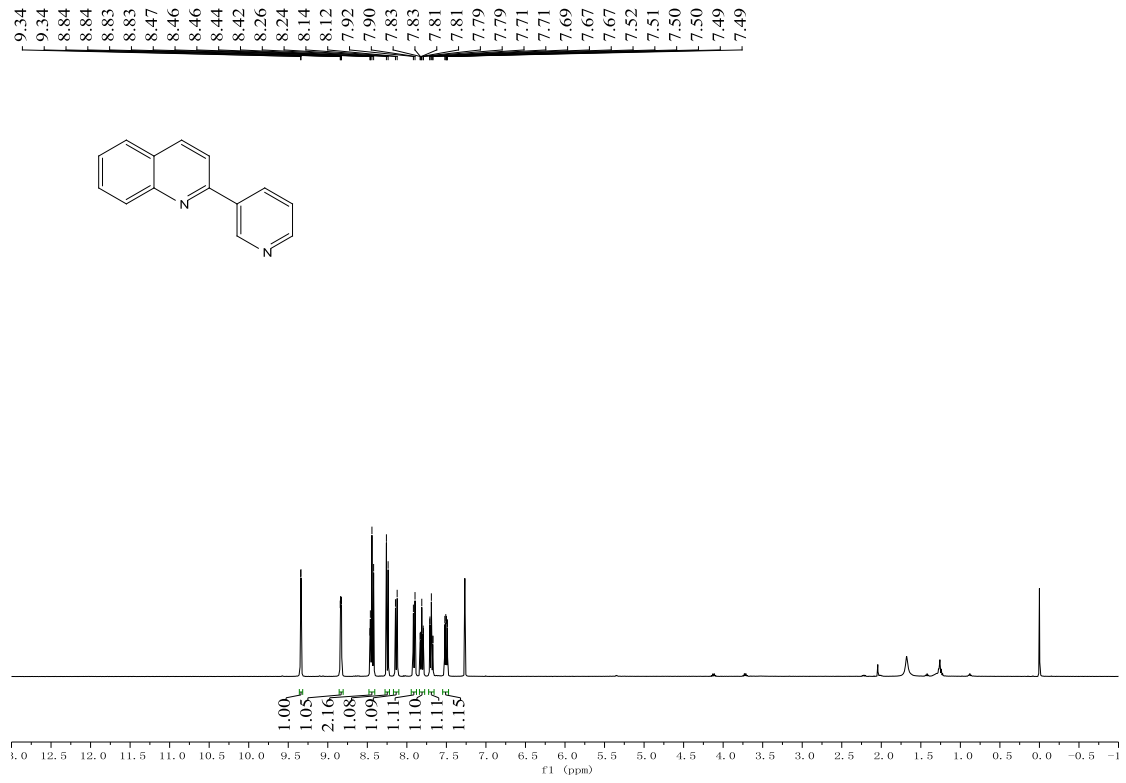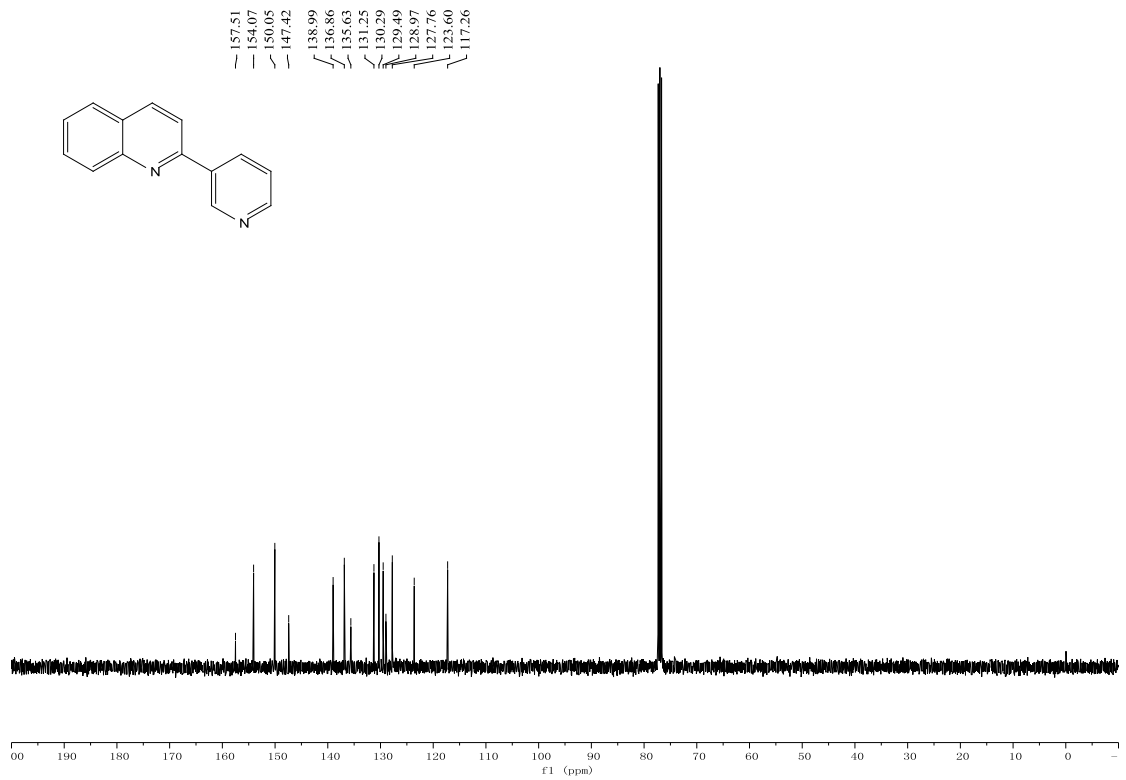

### 3-Methyl-2-(*p*-tolyl)quinoline (3ba)

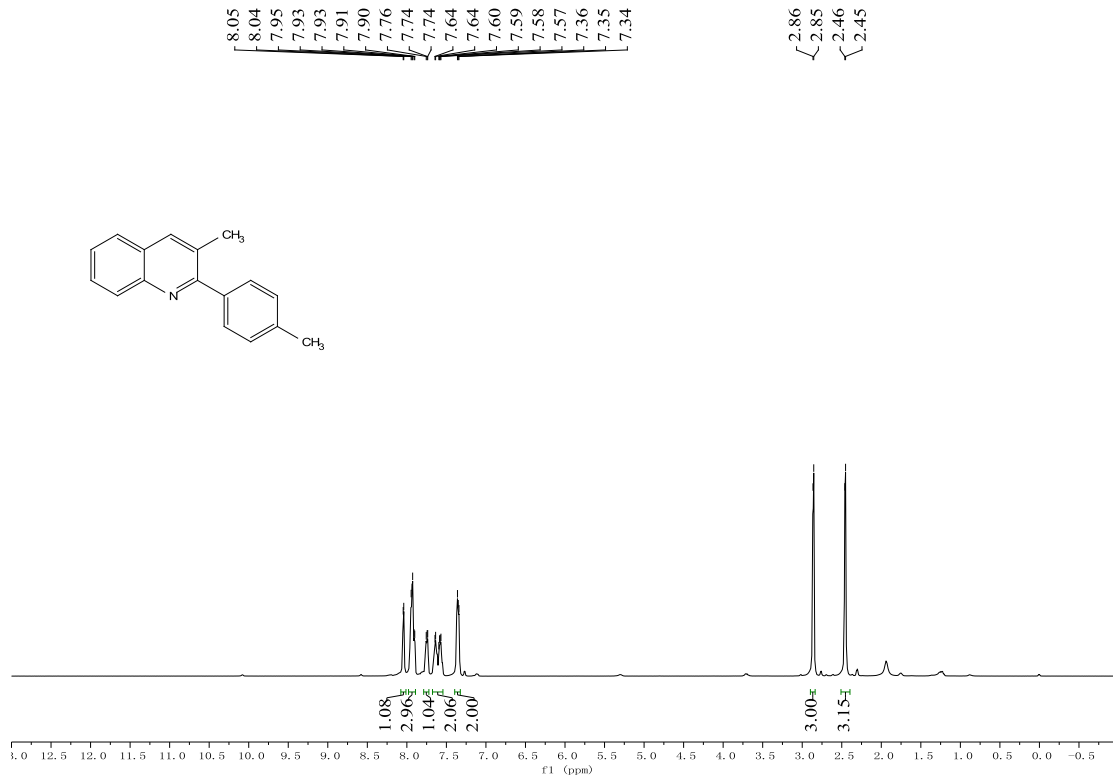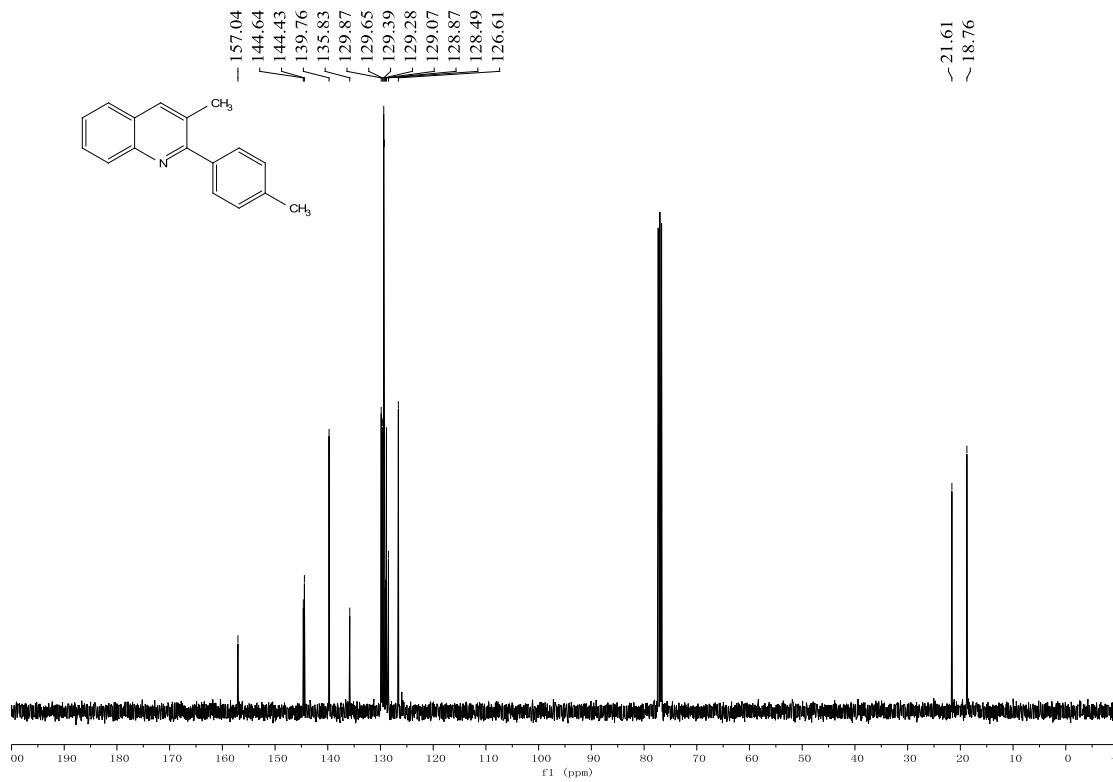

### 4-Methyl-2-(*p*-tolyl)quinolone (3ca)

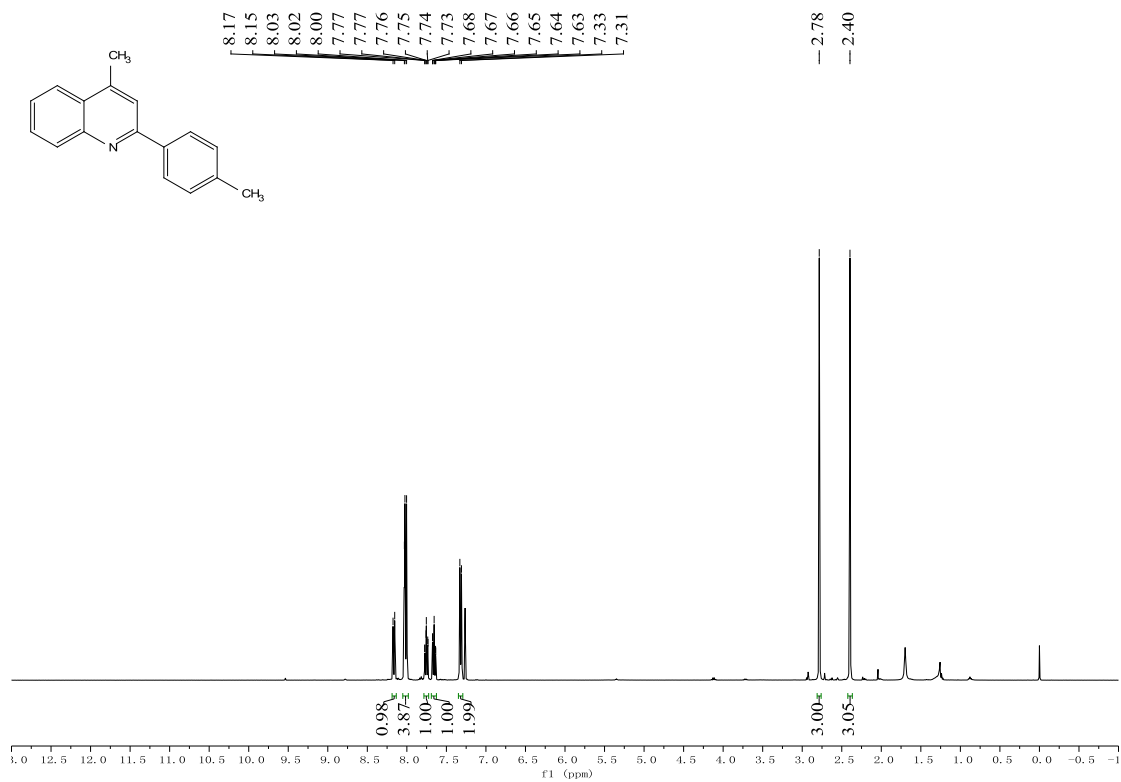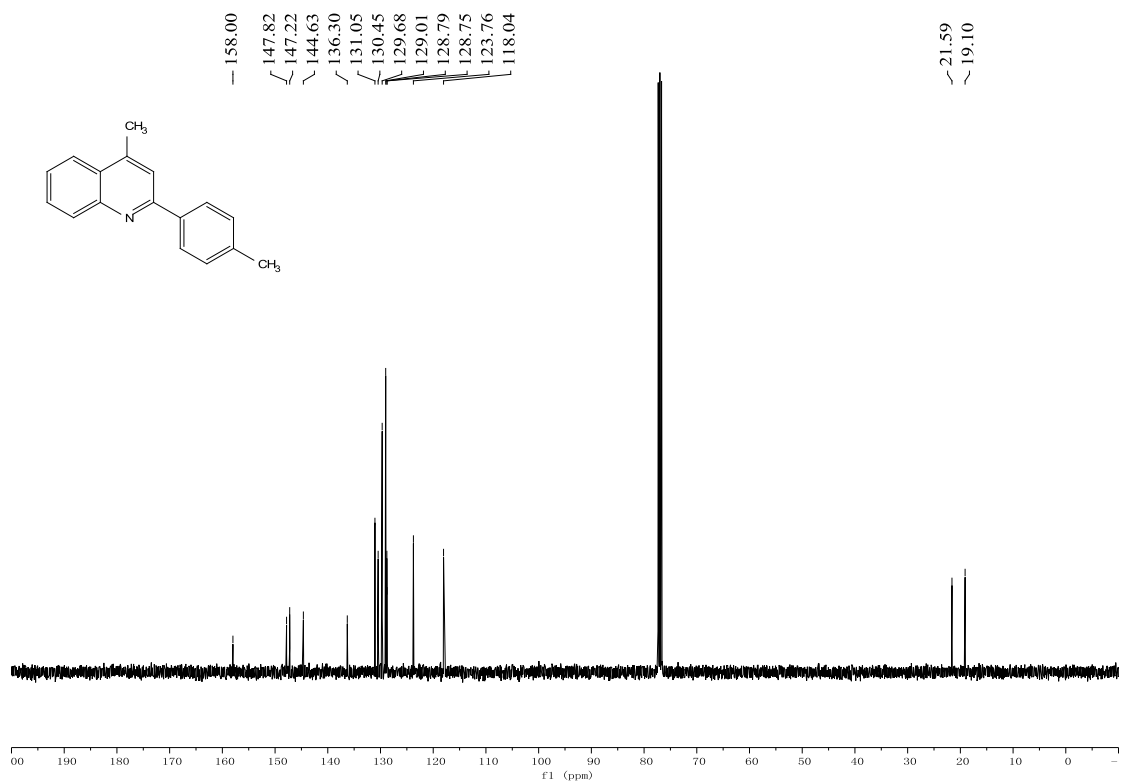

### 6-Methyl-2-(*p*-tolyl)quinolone (3da)

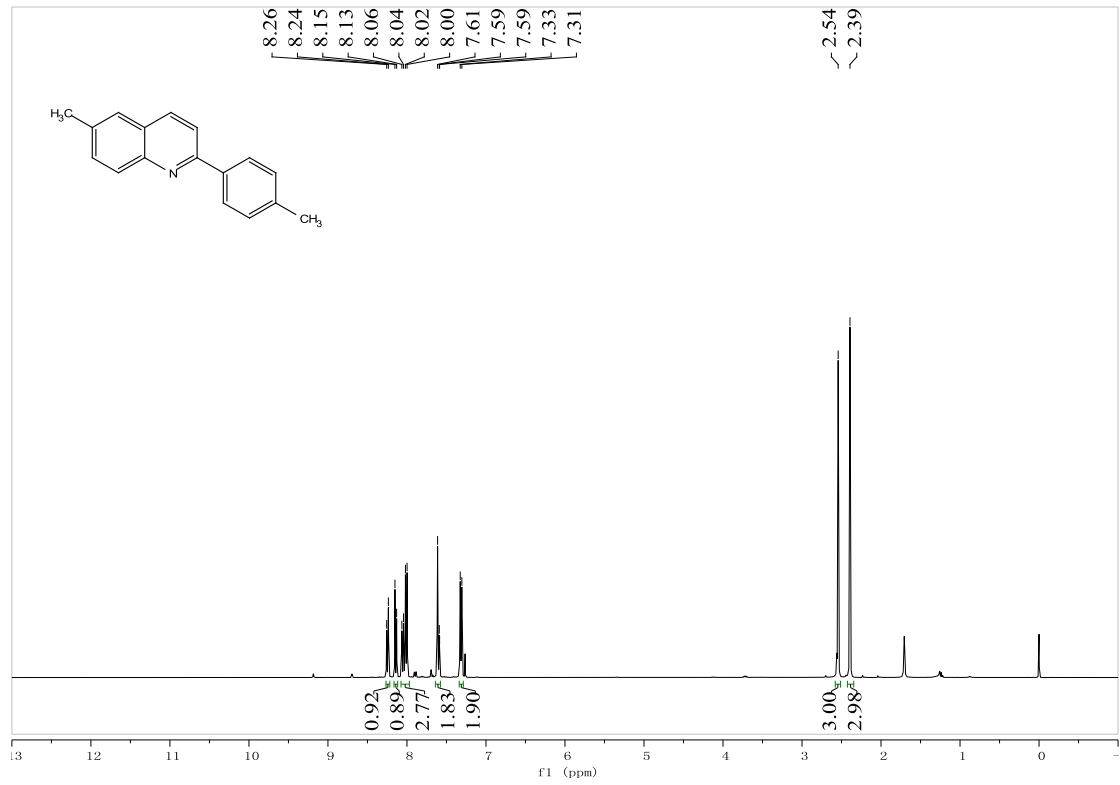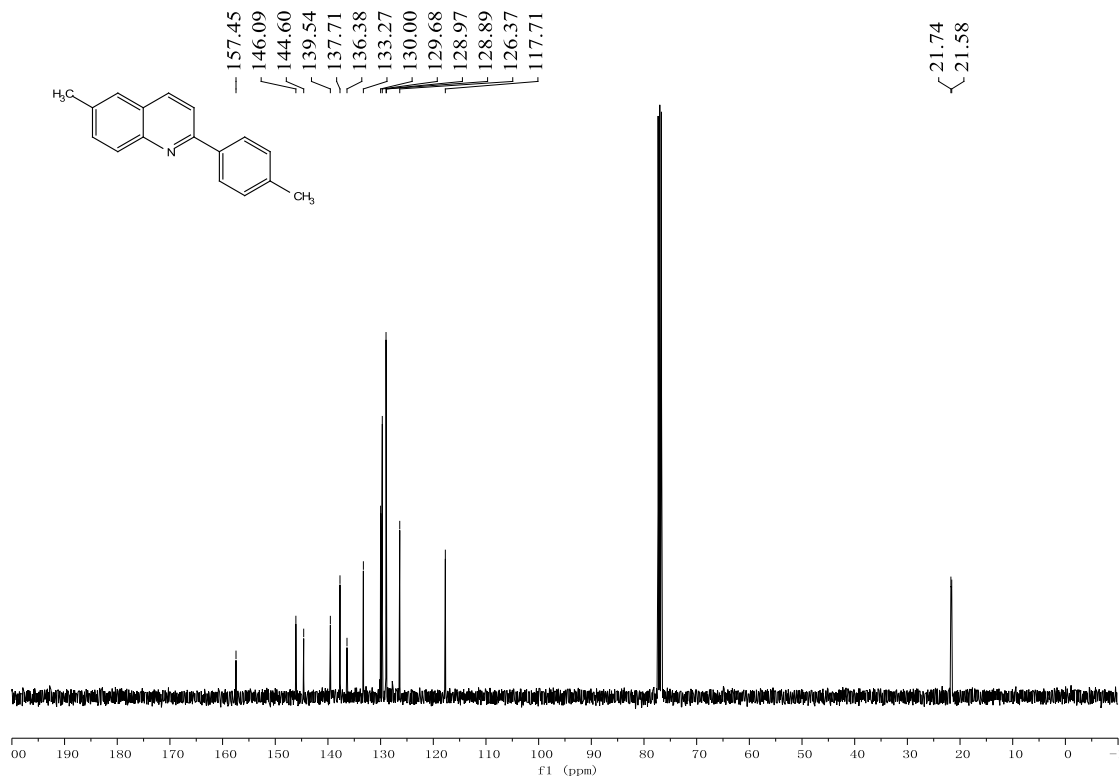

7-Methyl-2-(*p*-tolyl)quinolone (3ea)

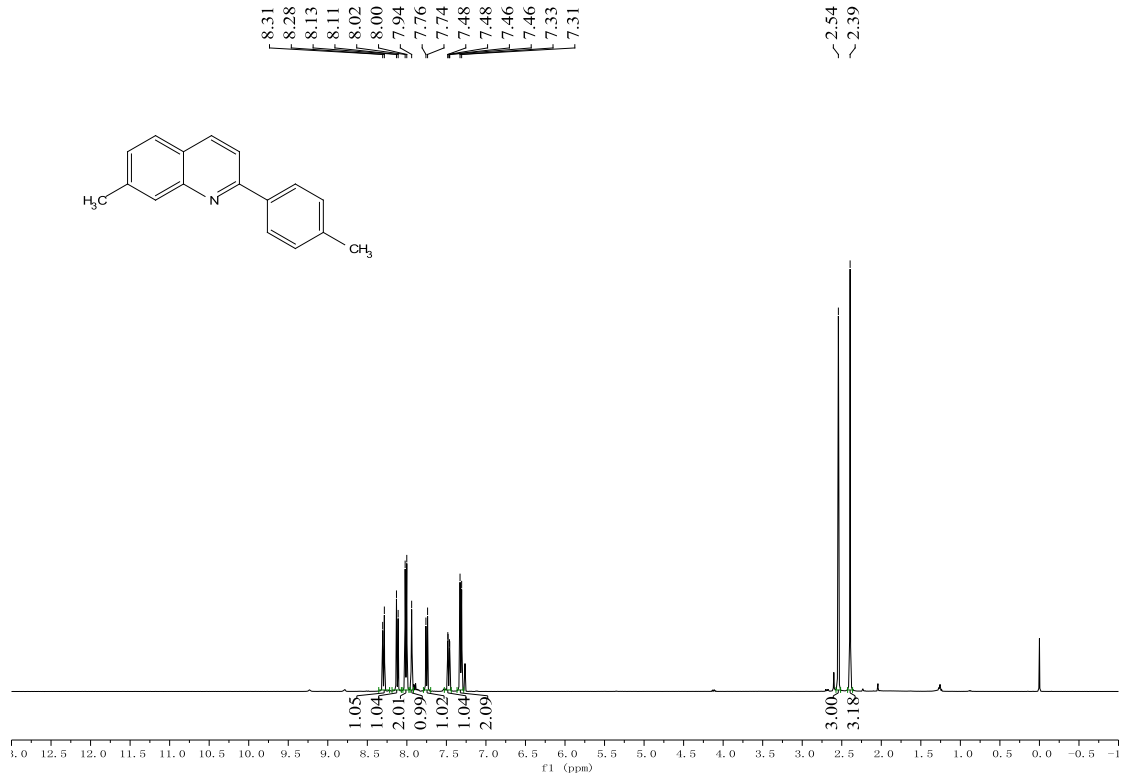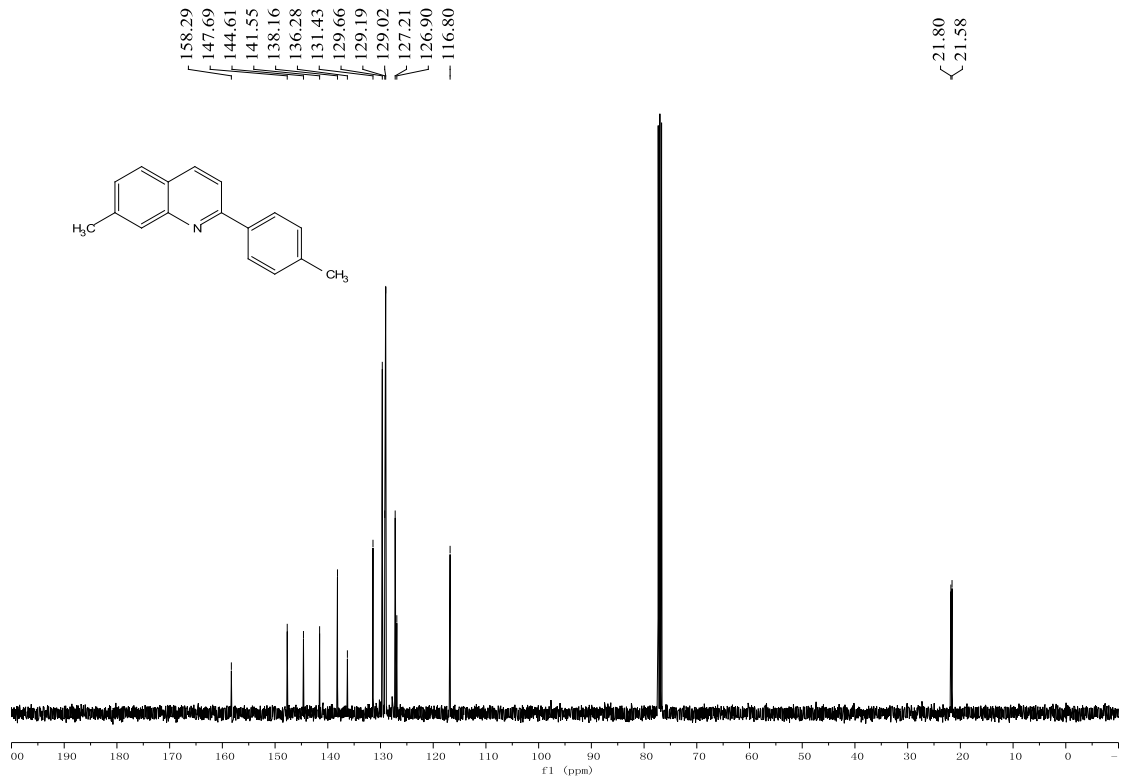

### 6-Isopropyl-2-(*p*-tolyl)quinolone (3fa)

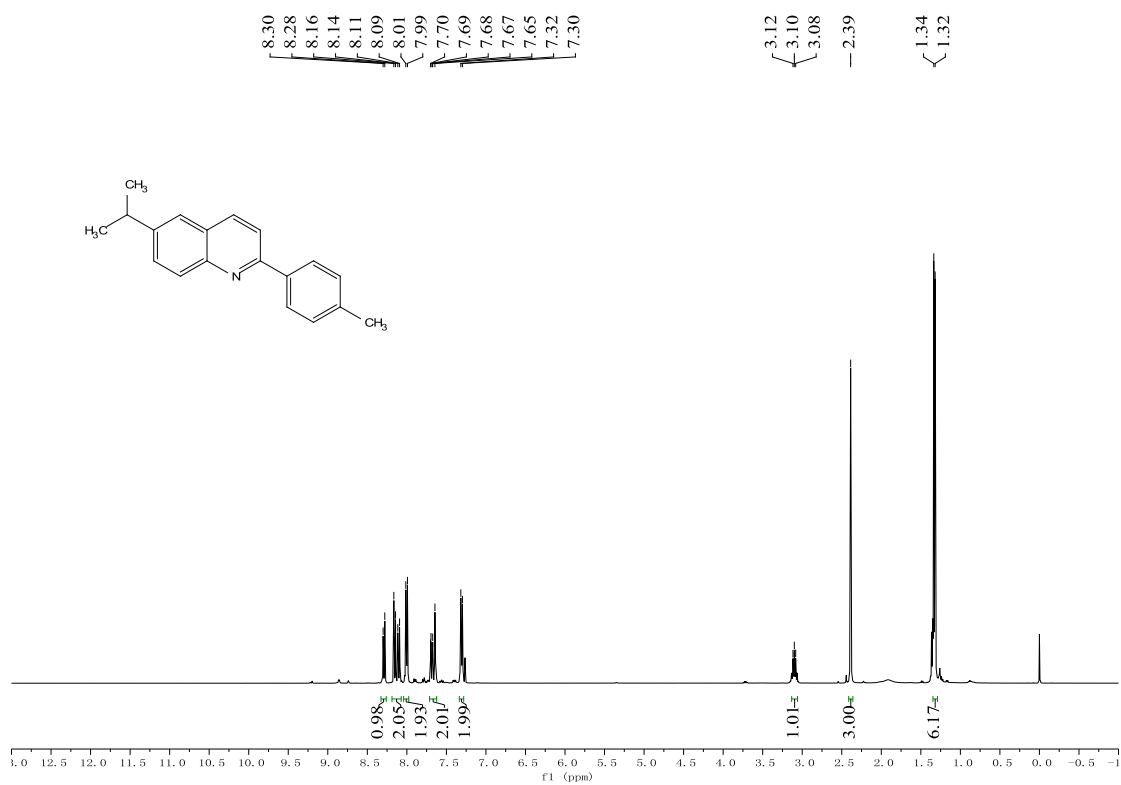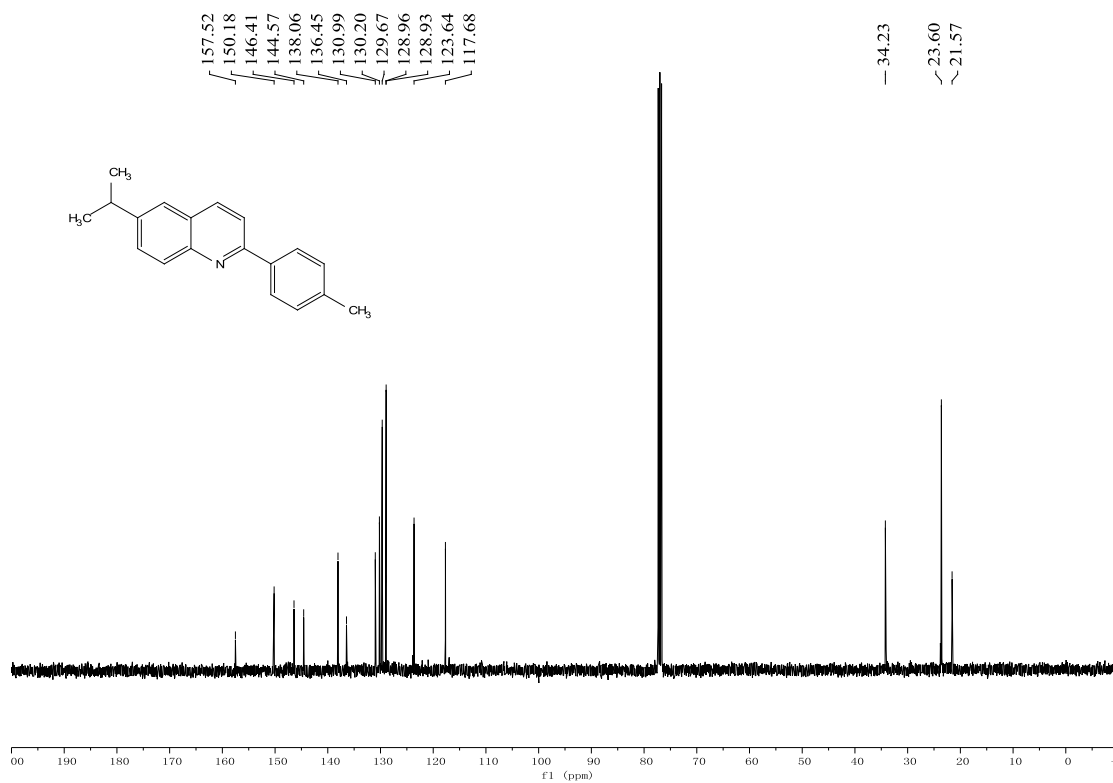

**6-Fluoro-2-(p-tolyl)quinoline (3ga)**

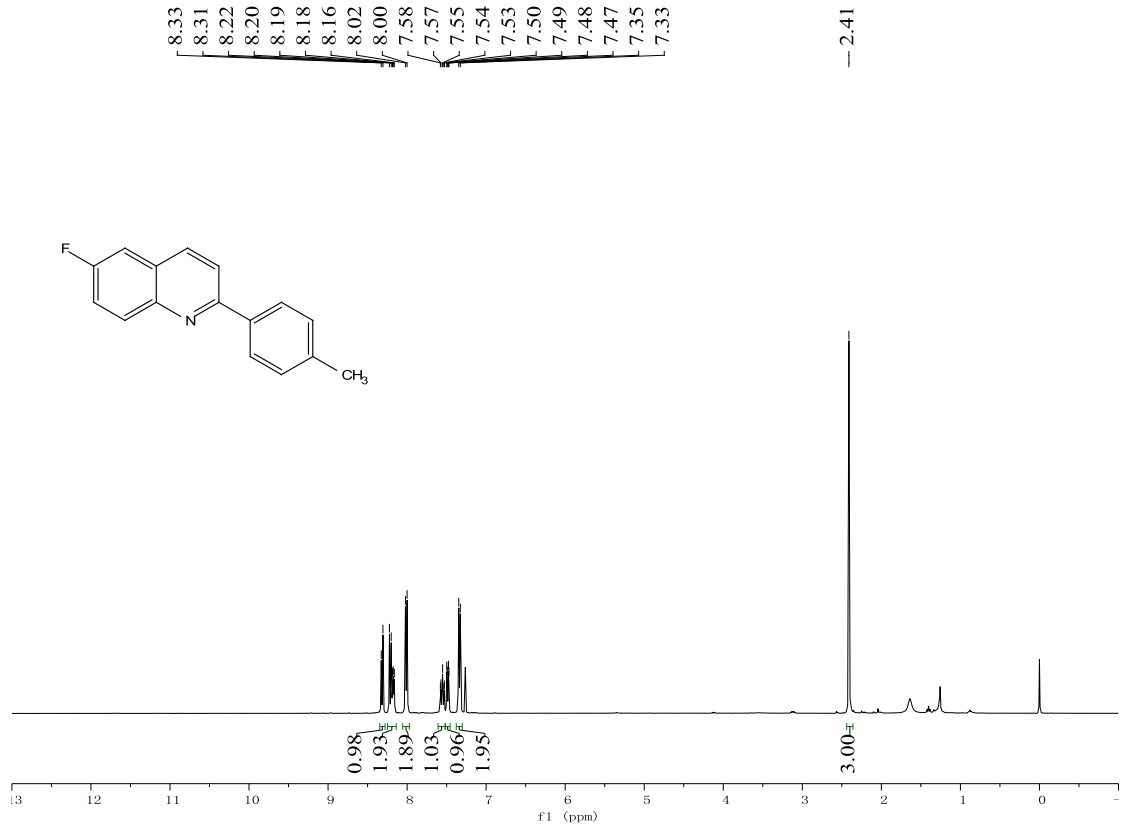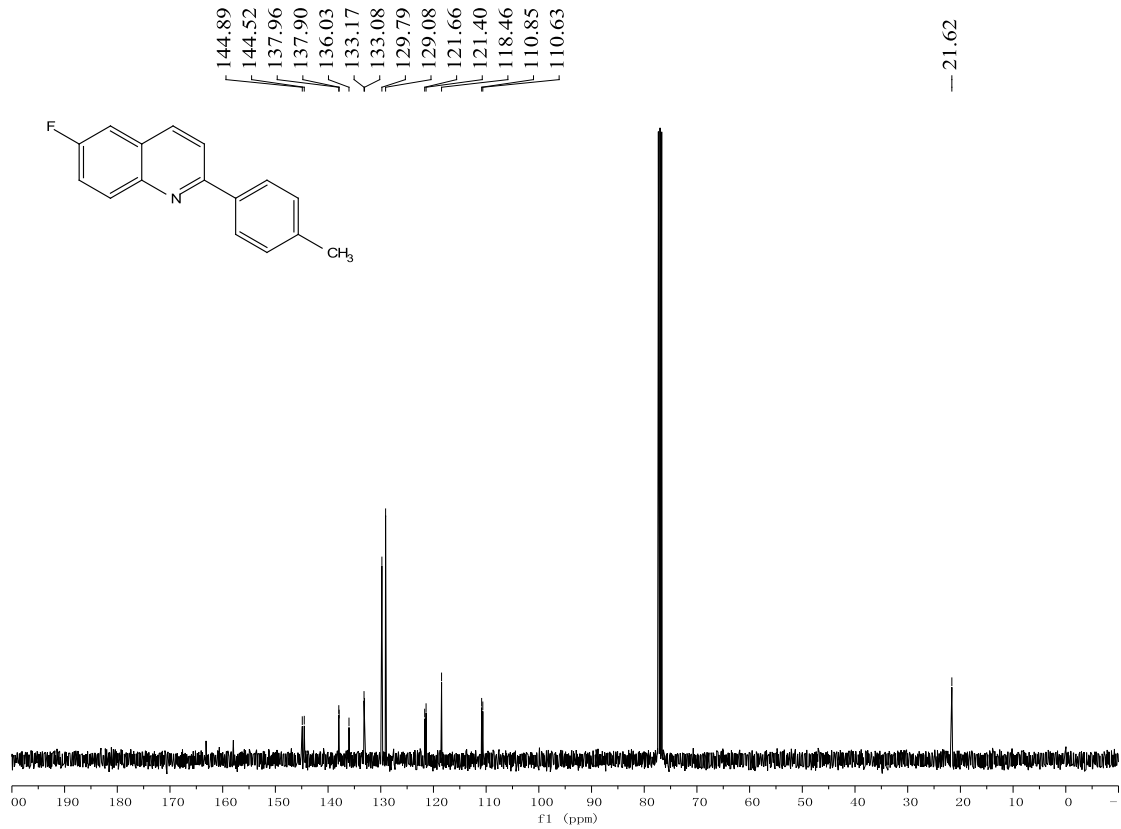



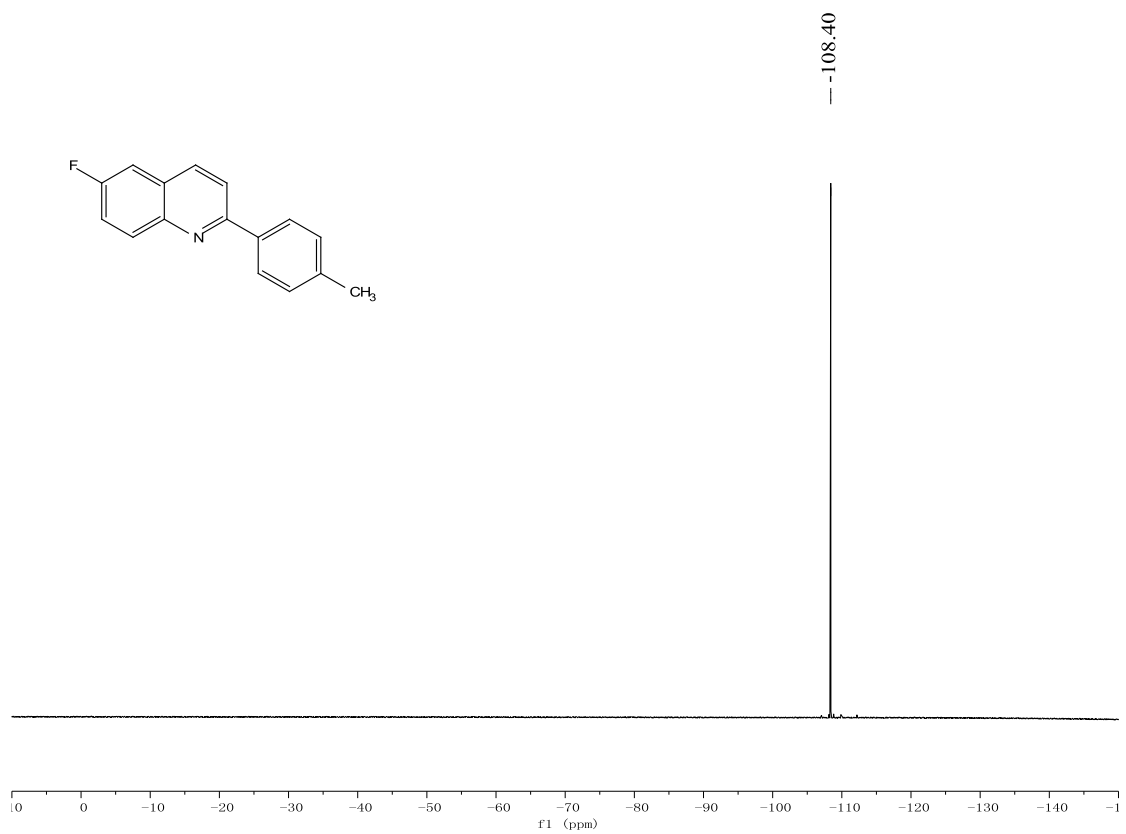

### 6-Chloro-2-(*p*-tolyl)quinoline (3ha)

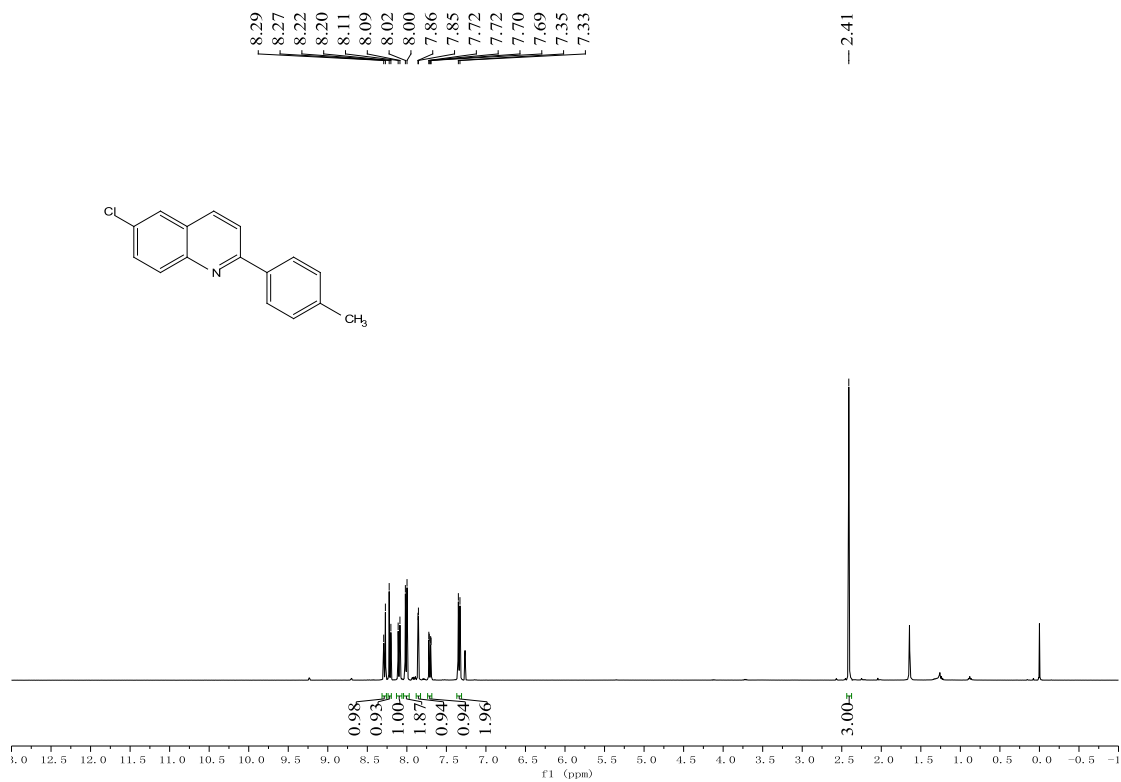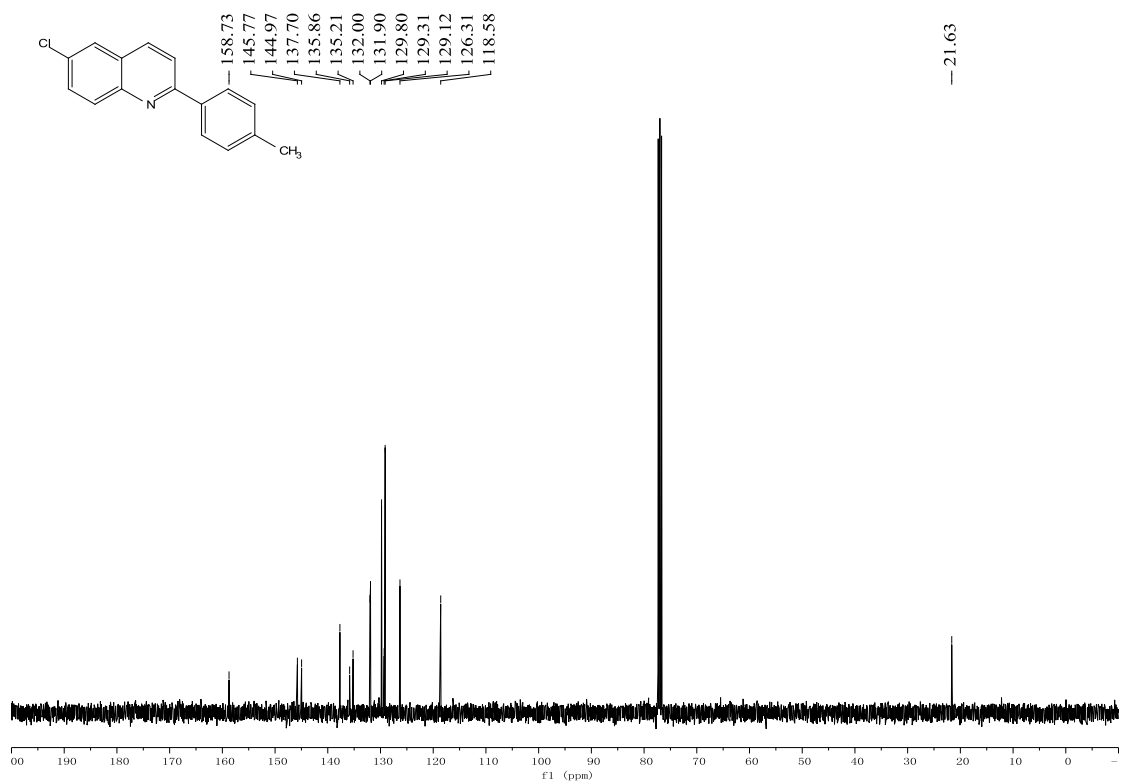

**6-Bromo-2-(p-tolyl)quinoline (3ia)**

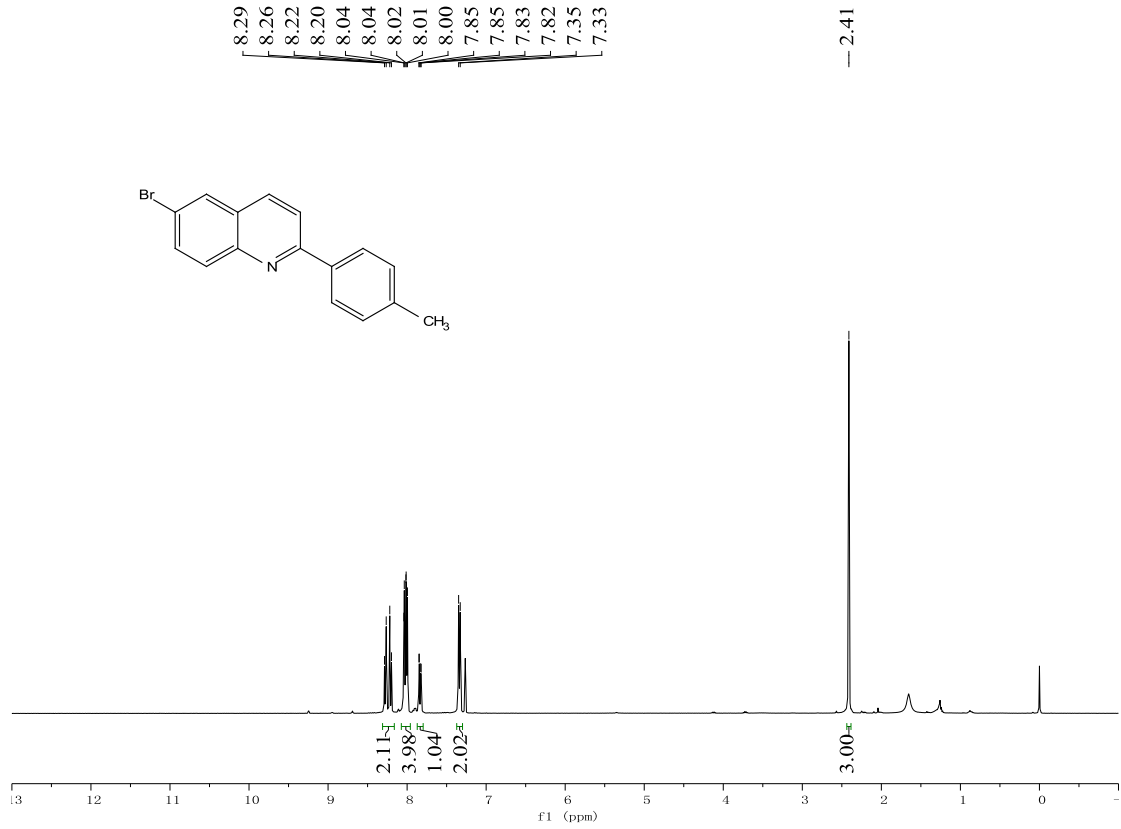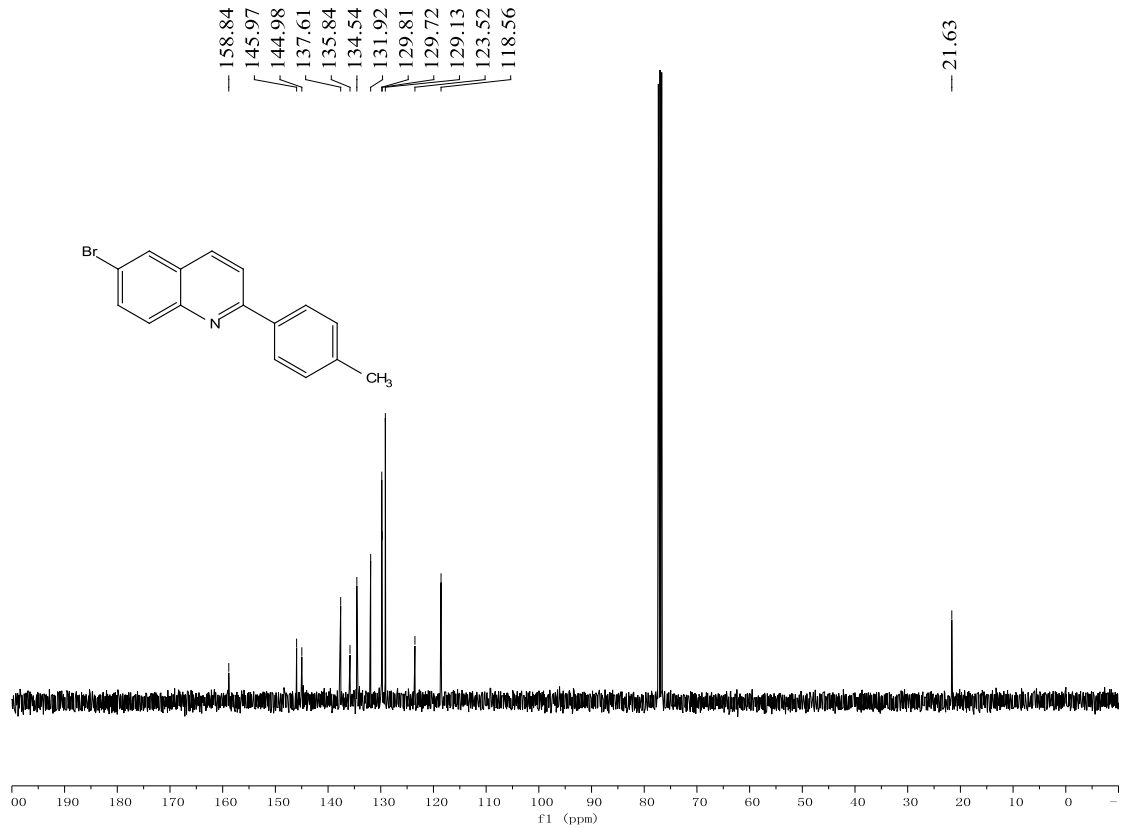

### 6-Methoxy-2-(*p*-tolyl)quinoline (3ja)

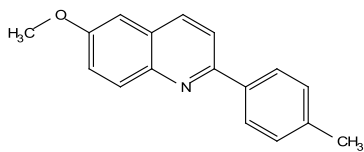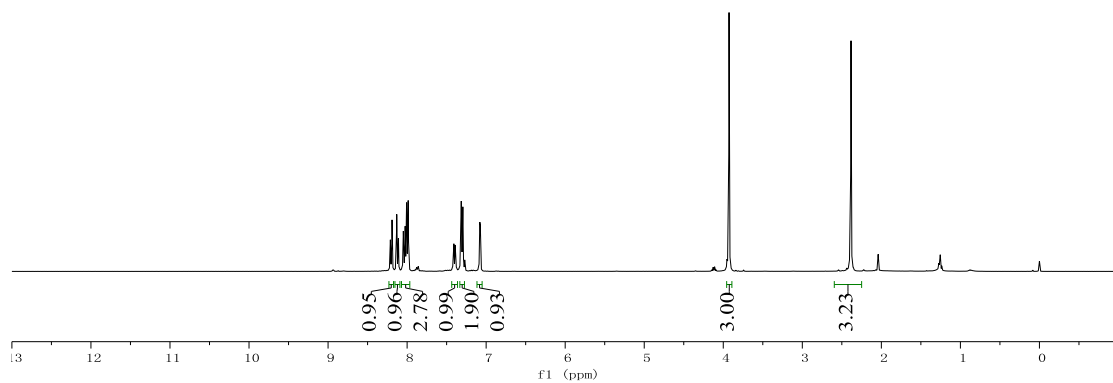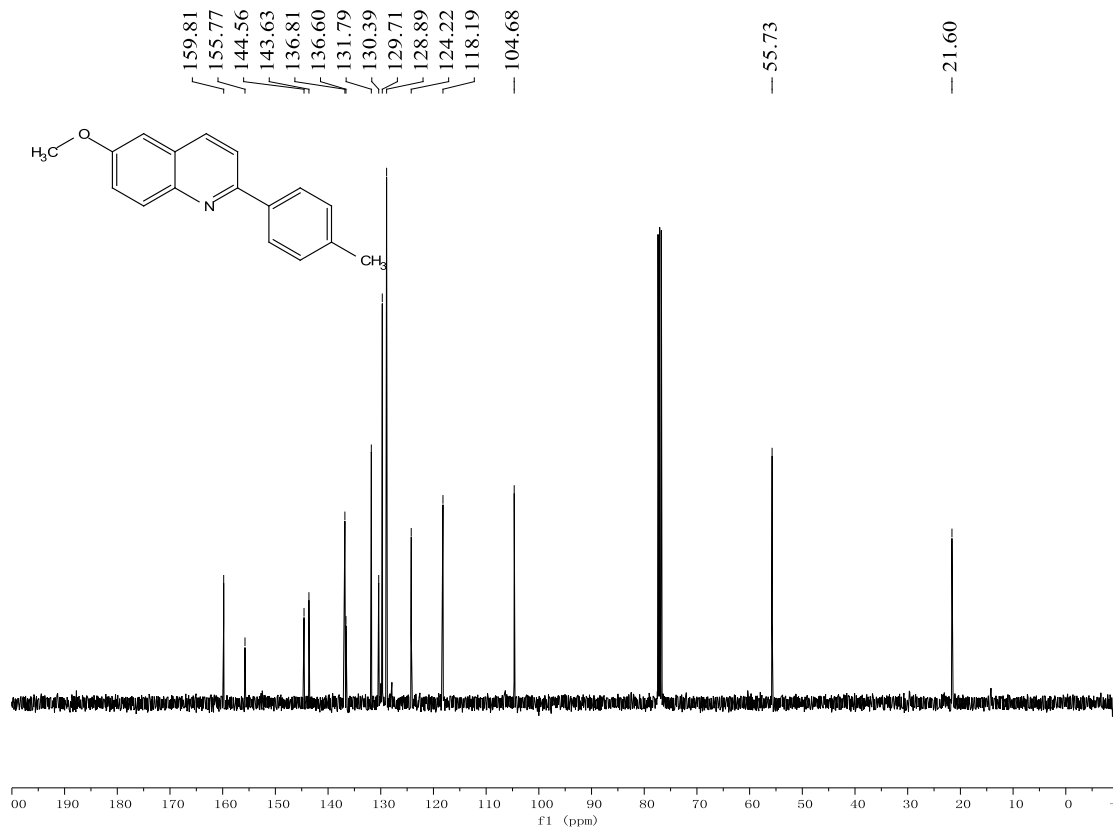

**3-Methoxy-2-(*p*-tolyl)quinoline (3ka)**

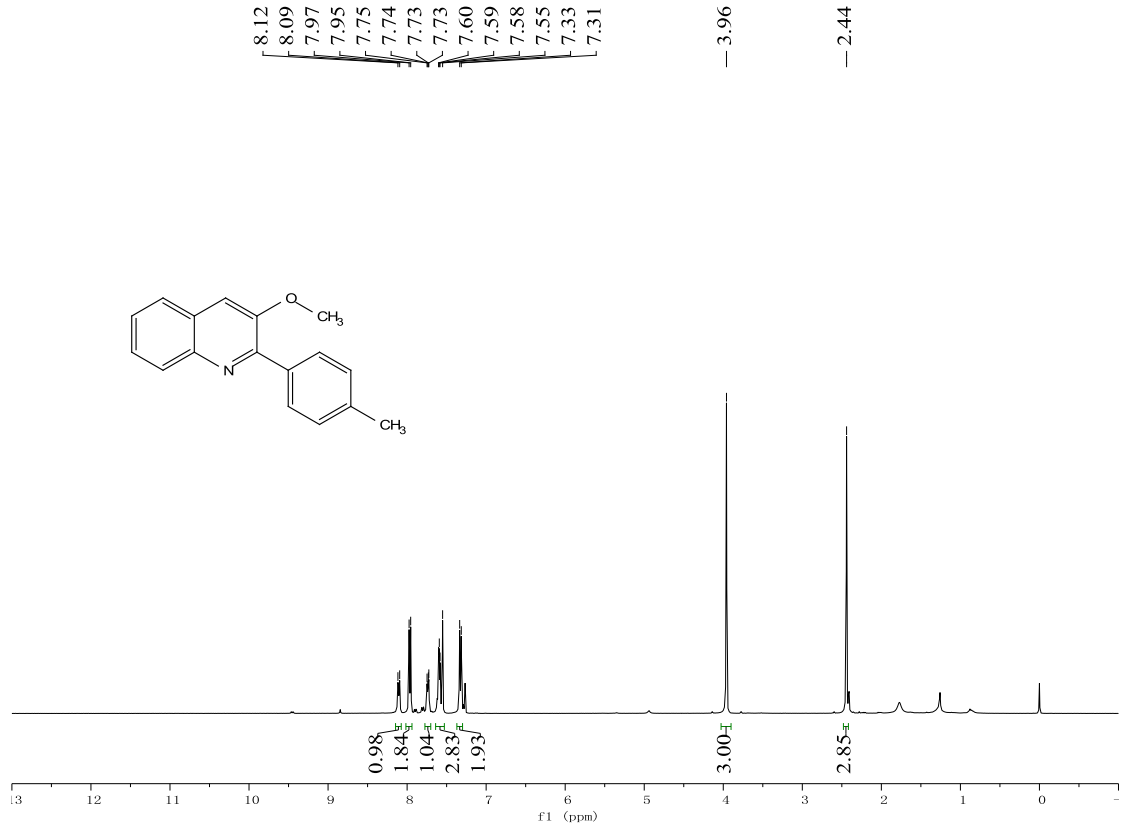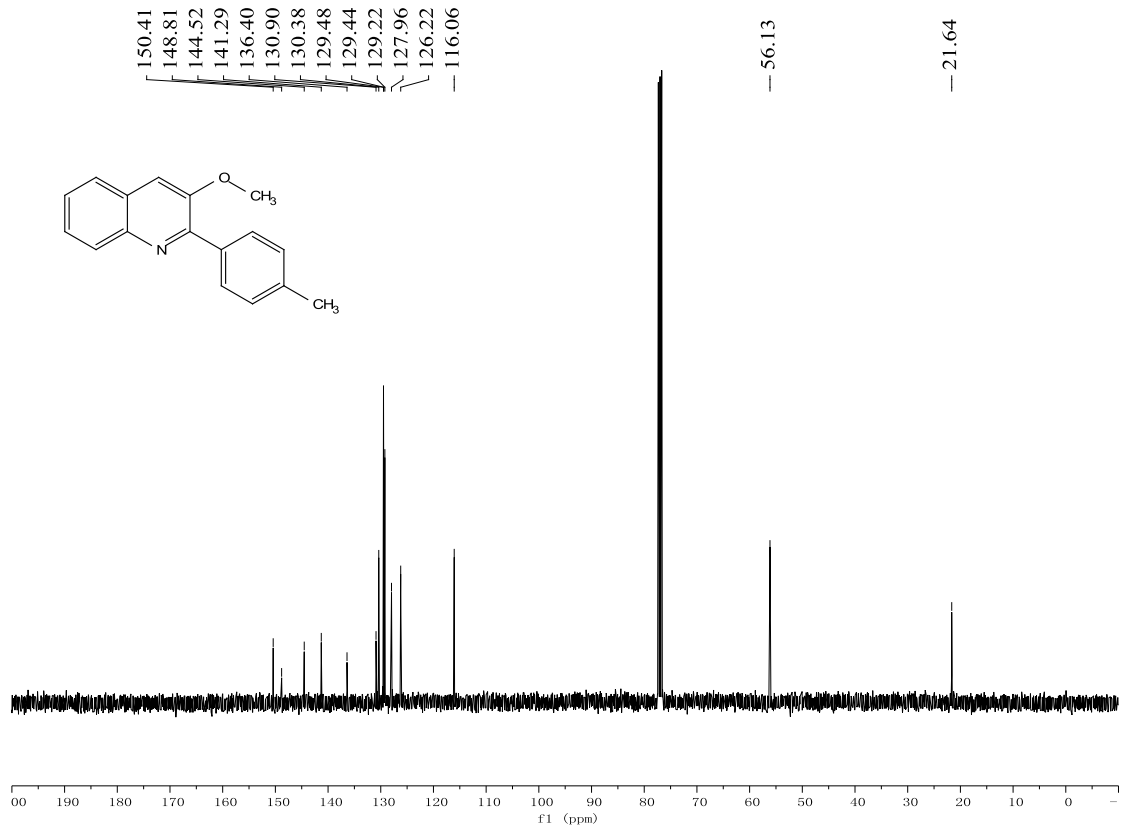

### 8-Ethoxy-2-(*p*-tolyl)quinoline (3la)

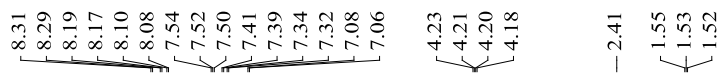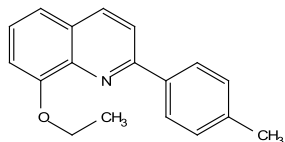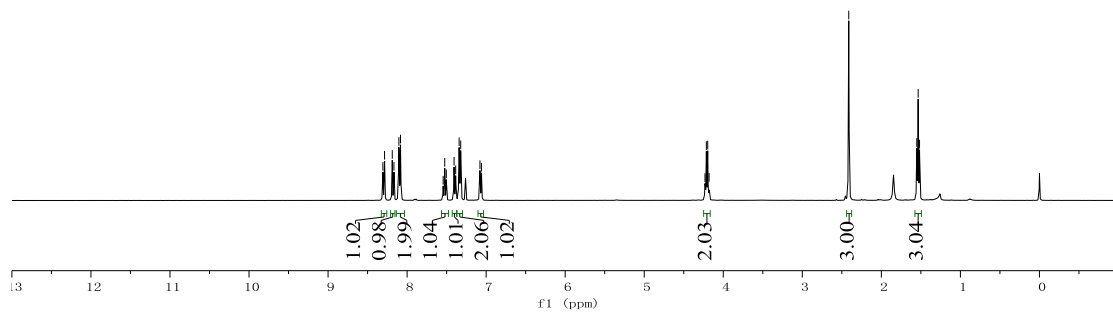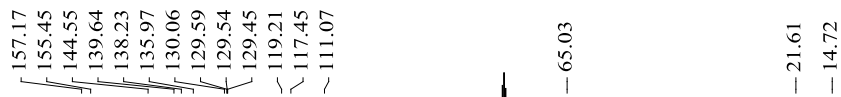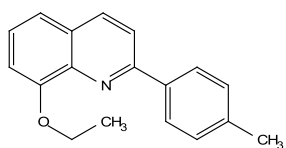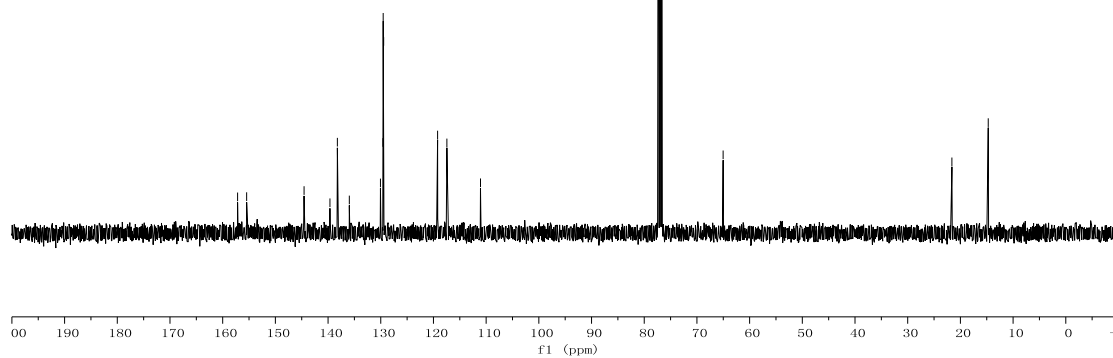

(2-Tosylethene-1,1-diyl)dibenzene (5a)

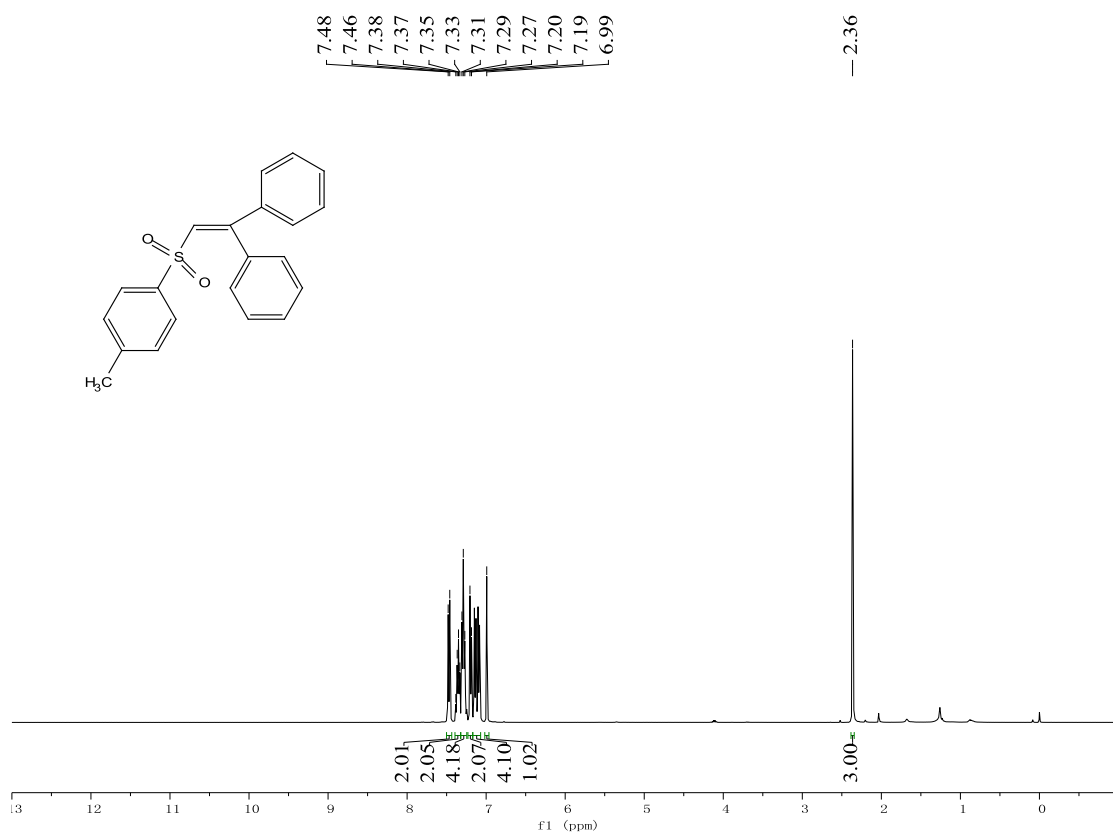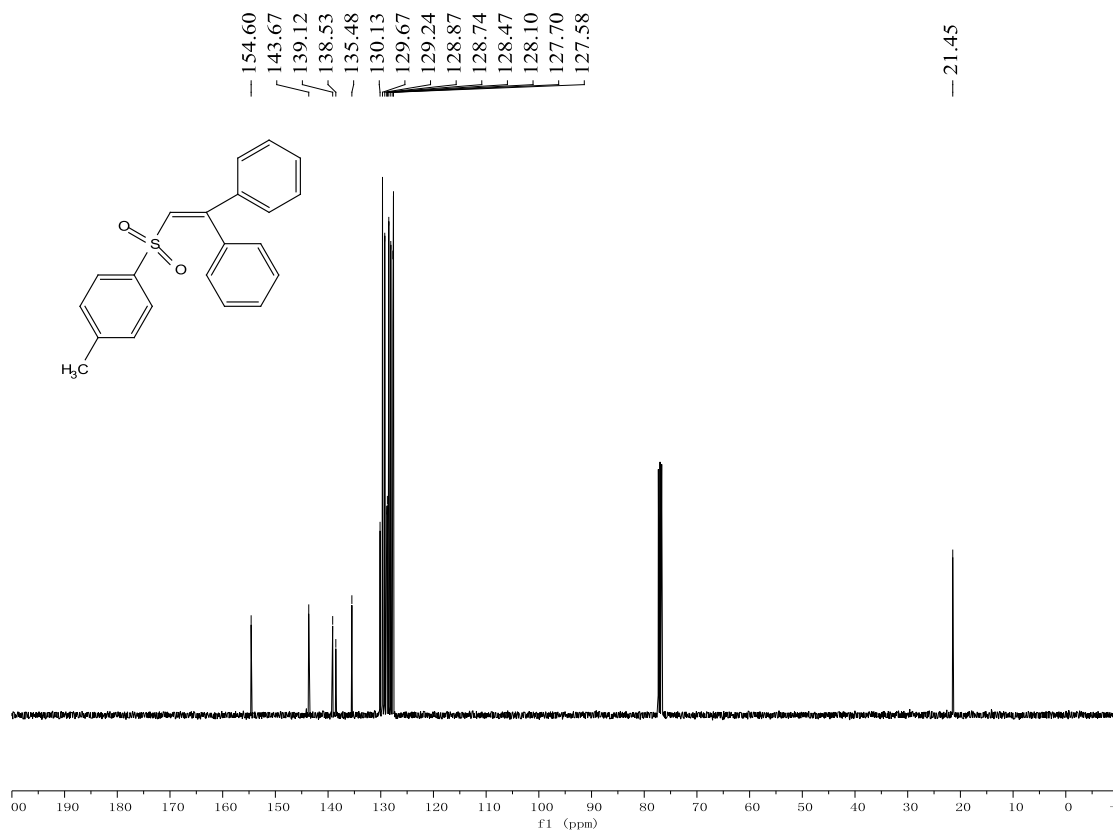

Supplement: c9cc05841a1.pdf [file c9cc05841a1.pdf]
